# Supplementary material for: Effect of the conjugation pathway on the electronic structures of p–π* conjugated polymers with fused borepin units
Source: Royal Society of Chemistry journal article supplement (doi:10.1039/d1py00528f), 2021-01-01
Supplement: d1py00528f1.pdf [file d1py00528f1.pdf]

## Supporting Information

# Effect of conjugation pathway on electronic structures in p- $\pi^*$ conjugated polymers with fused borepin units

Yohei Adachi,<sup>\*a</sup> Fuka Arai,<sup>a</sup> Mitsuru Sakabe,<sup>a</sup> and Joji Ohshita<sup>\*a,b</sup>

<sup>a</sup> *Smart Innovation Program, Graduate School of Advanced Science and Engineering, Hiroshima University, Higashi-Hiroshima 739-8527, Japan*

<sup>b</sup> *Division of Materials Model-Based Research, Digital Monozukuri (Manufacturing) Education and Research Center, Hiroshima University, Higashi-Hiroshima 739-0046, Japan*

## Supporting Figures and Tables

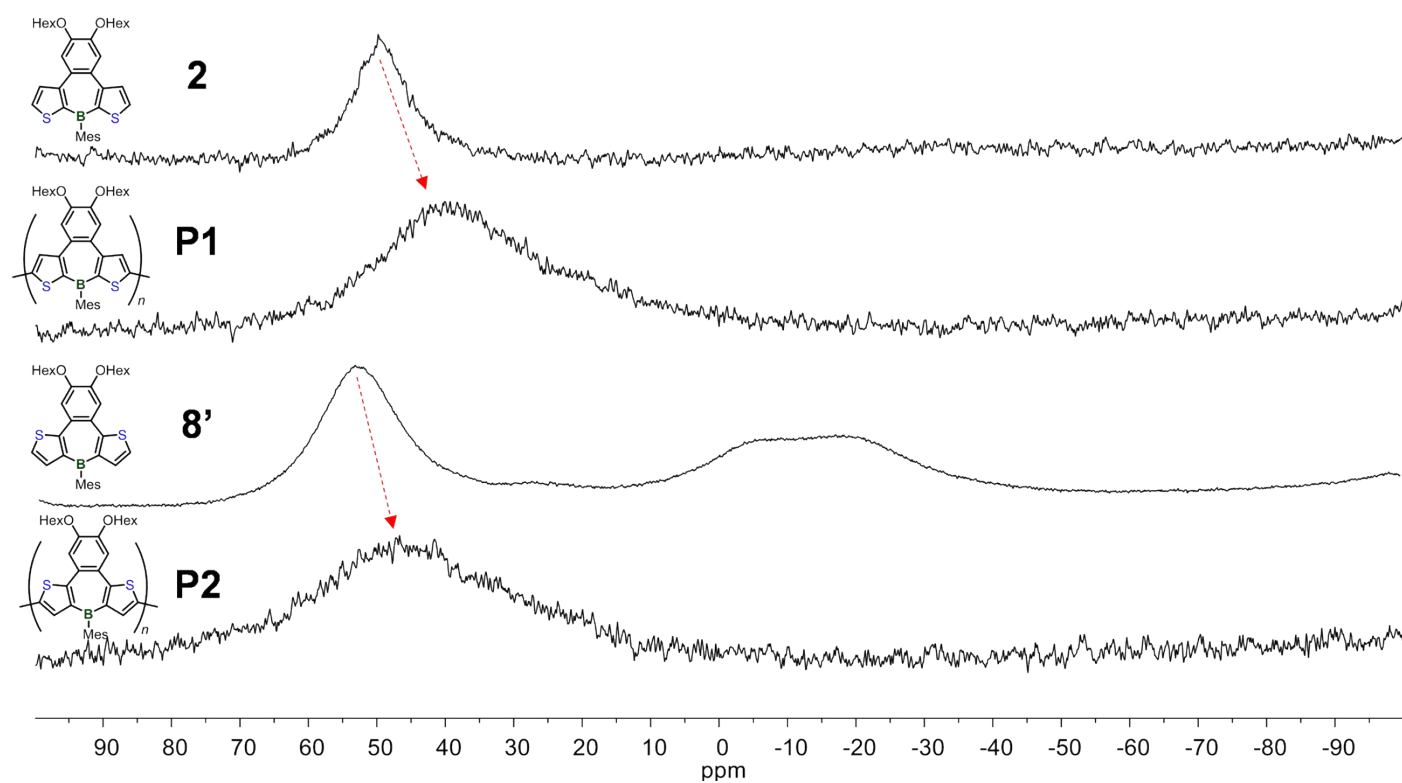

**Figure S1.**  $^{11}\text{B}$  NMR spectra of **2**, **P1**, **8'**, and **P2** in  $\text{CDCl}_3$  at room temperature.

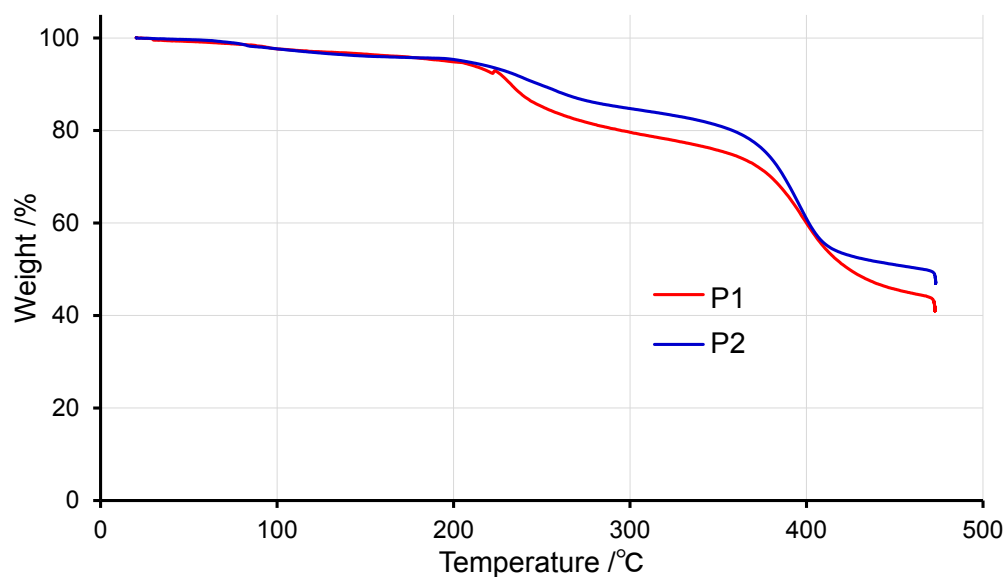

**Figure S2.** TGA curves of **P1** and **P2** under nitrogen atmosphere at the heating rate of  $10\text{ °C min}^{-1}$ .

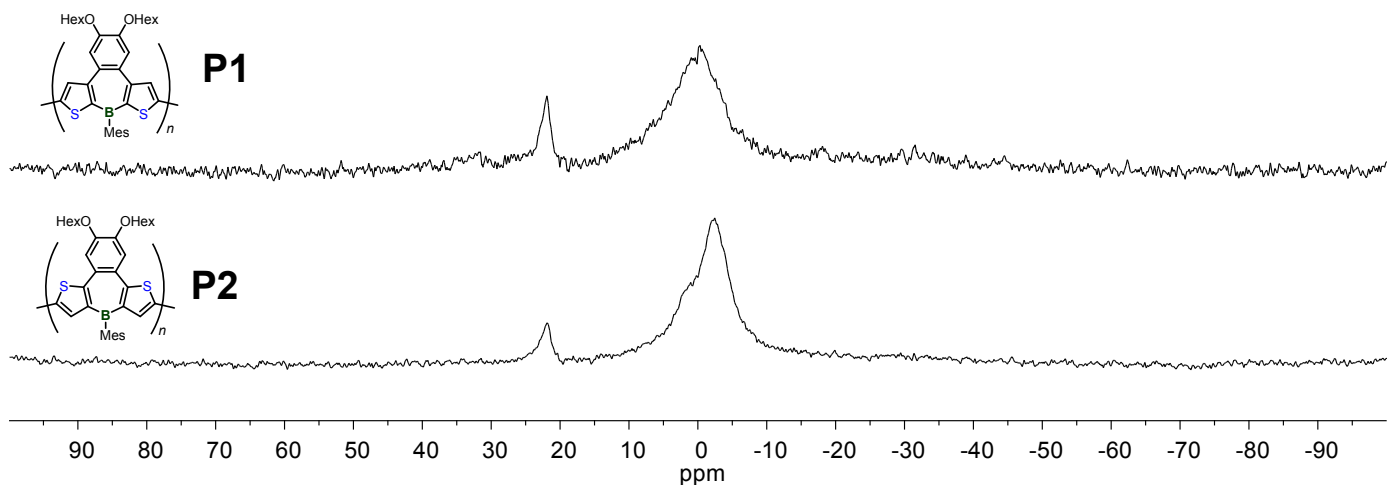

**Figure S3.**  $^{11}\text{B}$  NMR spectra of **P1** and **P2** in pyridine- $d_5$  at room temperature.

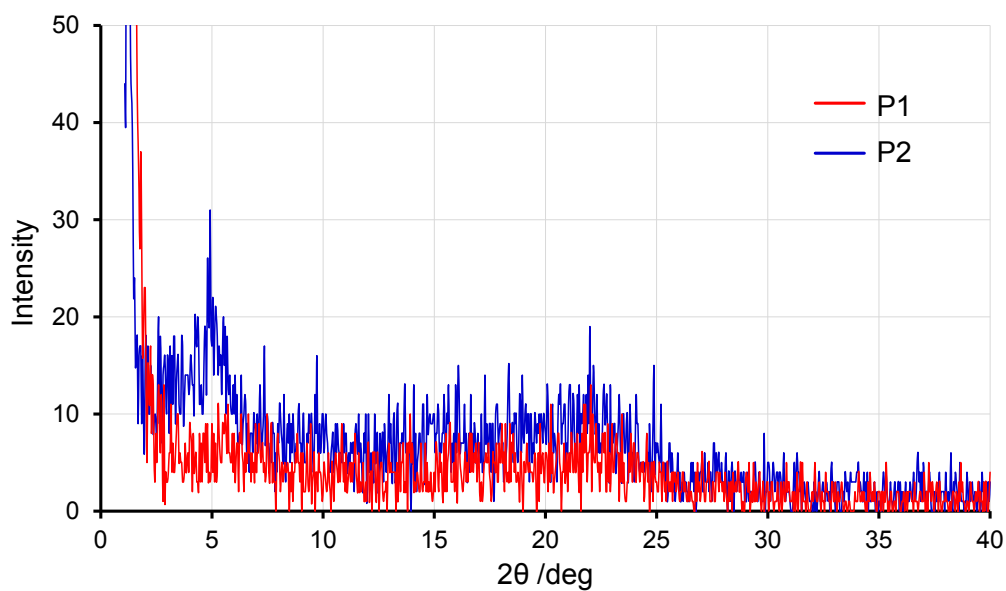

**Figure S4.** Powder X-ray diffraction patterns of **P1** and **P2**.

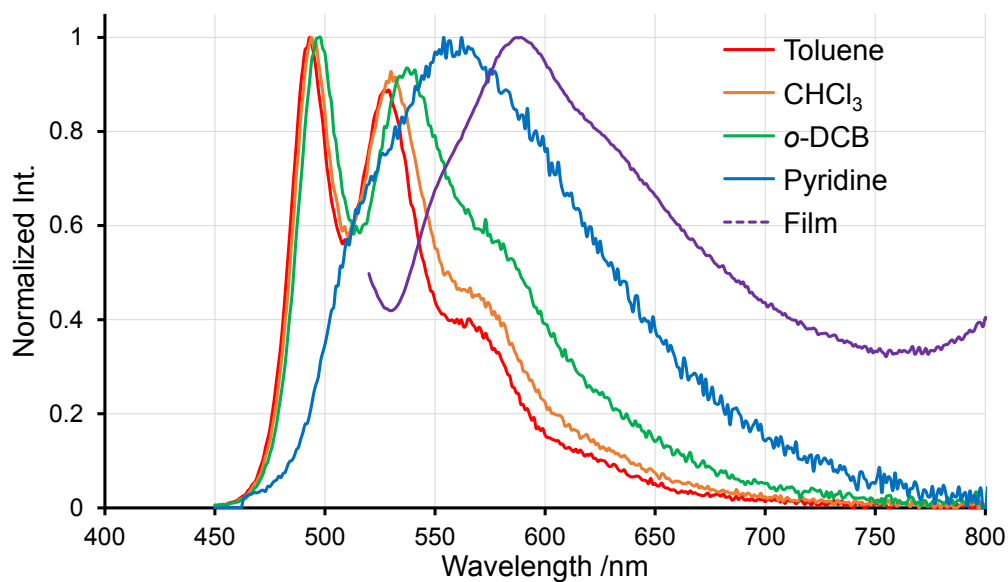

**Figure S5.** Fluorescence spectra of **P1** in various solvents and in cast film.

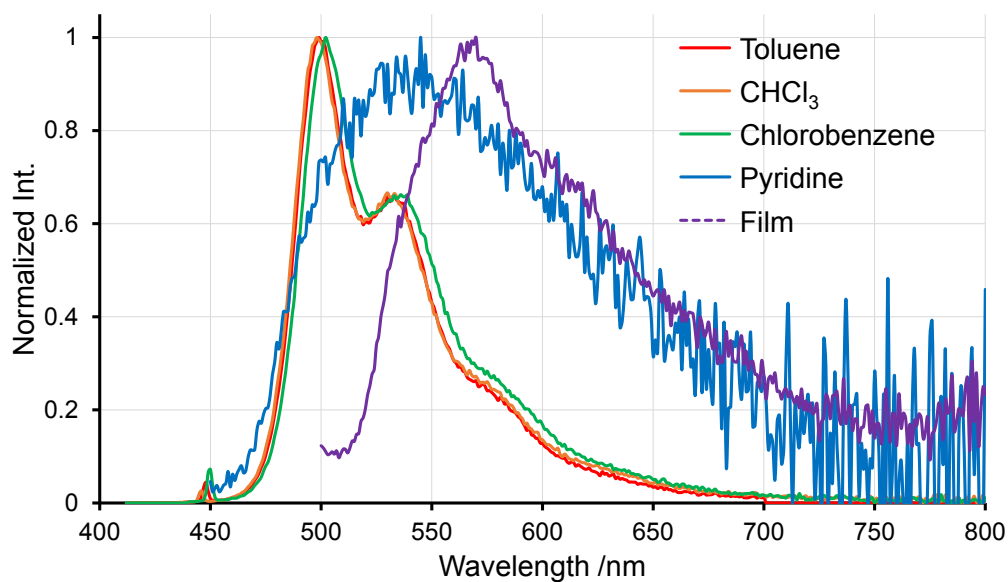

**Figure S6.** Fluorescence spectra of **P2** in various solvents and in cast film.

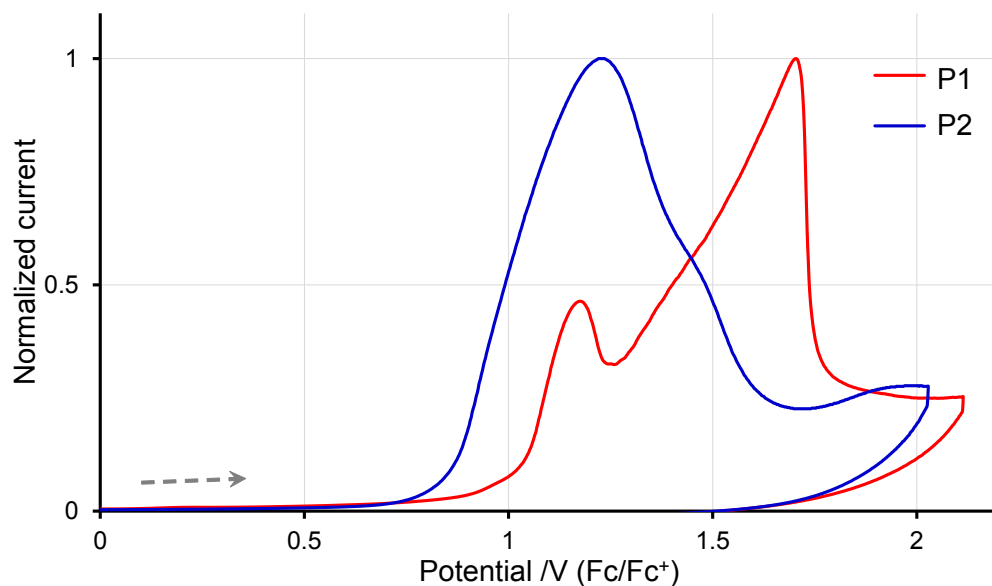

**Figure S7.** Anodic cyclic voltammetry data for **P1** and **P2** films in acetonitrile with 0.1 M TBAPF<sub>6</sub> at the scan rate of 100 mV/s.

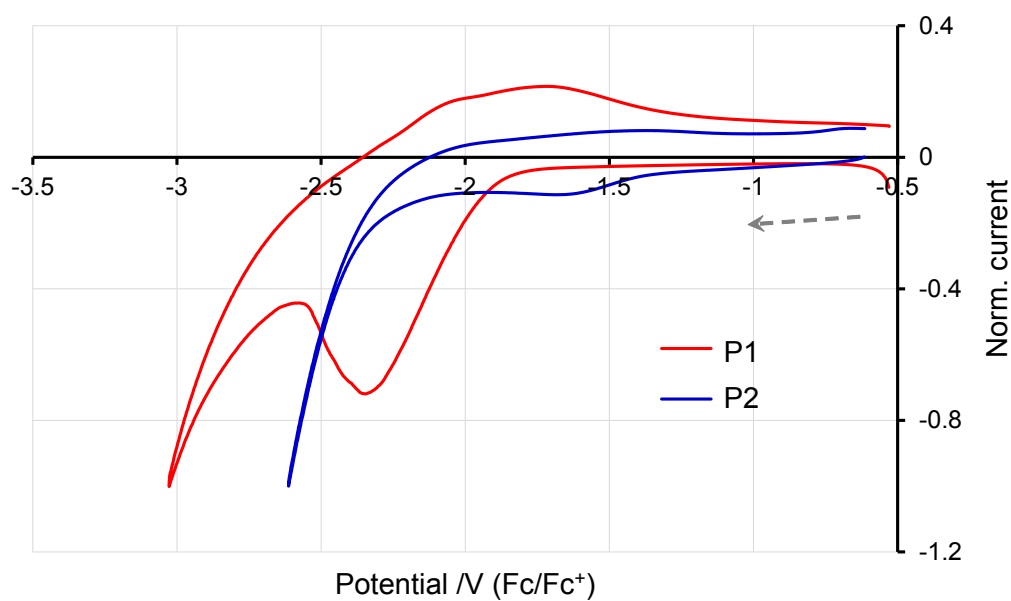

**Figure S8.** Cathodic cyclic voltammetry data for **P1** and **P2** films in acetonitrile with 0.1 M TBAPF<sub>6</sub> at the scan rate of 100 mV/s.

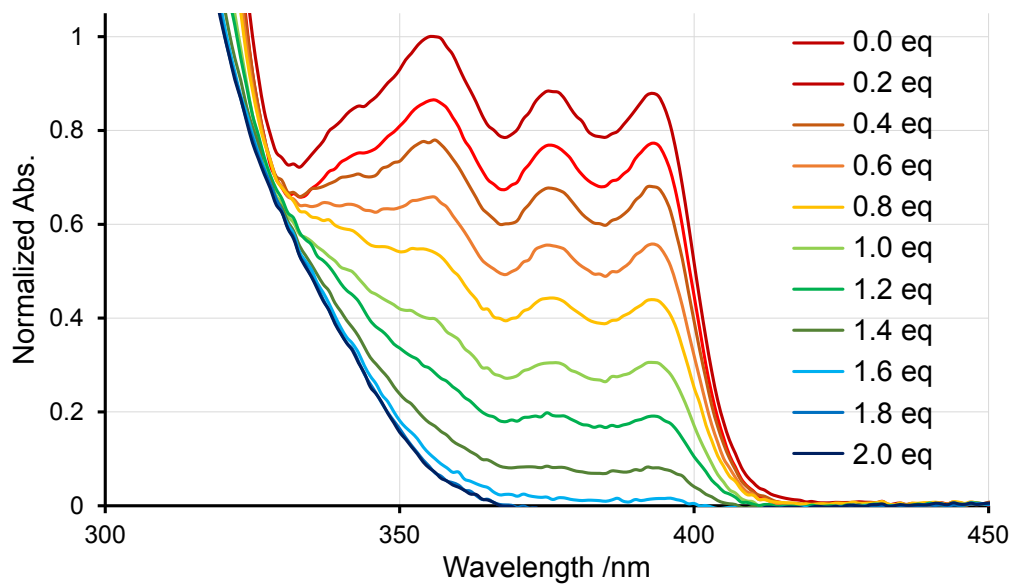

**Figure S9.** UV-Vis absorption data for titrations of **8'** with TBACN aliquots in toluene.

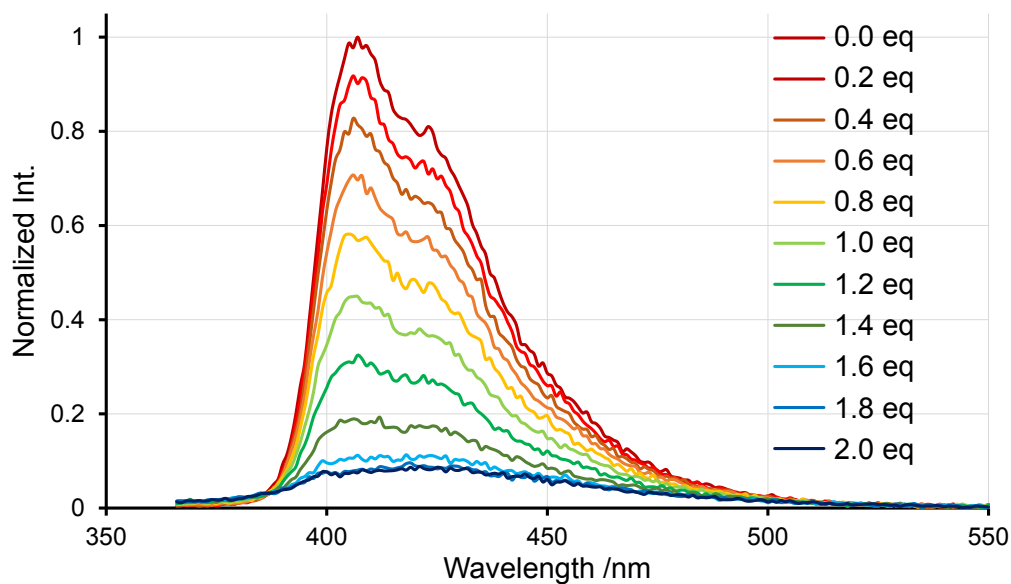

**Figure S10.** Fluorescence data for titrations of **8'** with TBACN aliquots in toluene.

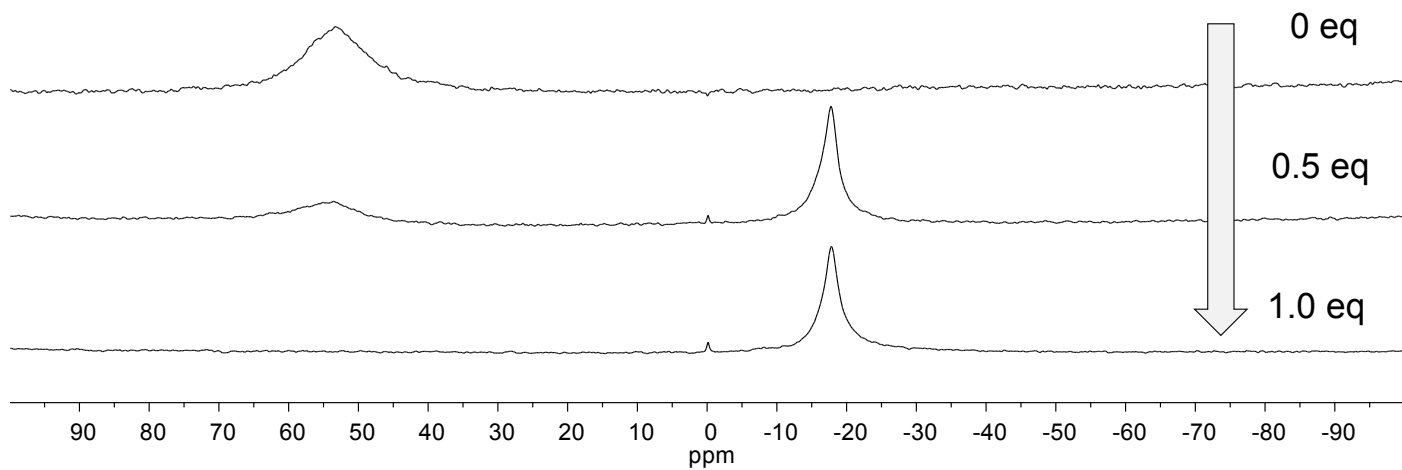

**Figure S11.**  $^{11}\text{B}$  NMR spectra of **8'** before and after the addition of TBACN in benzene- $d_6$ .

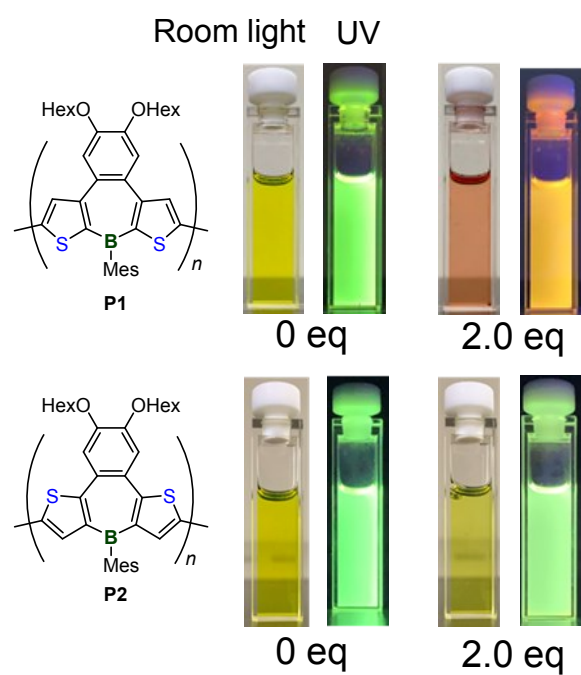

**Figure S12.** Photographs of diluted solutions of **P1** and **P2** before and after the addition of TBACN in toluene.

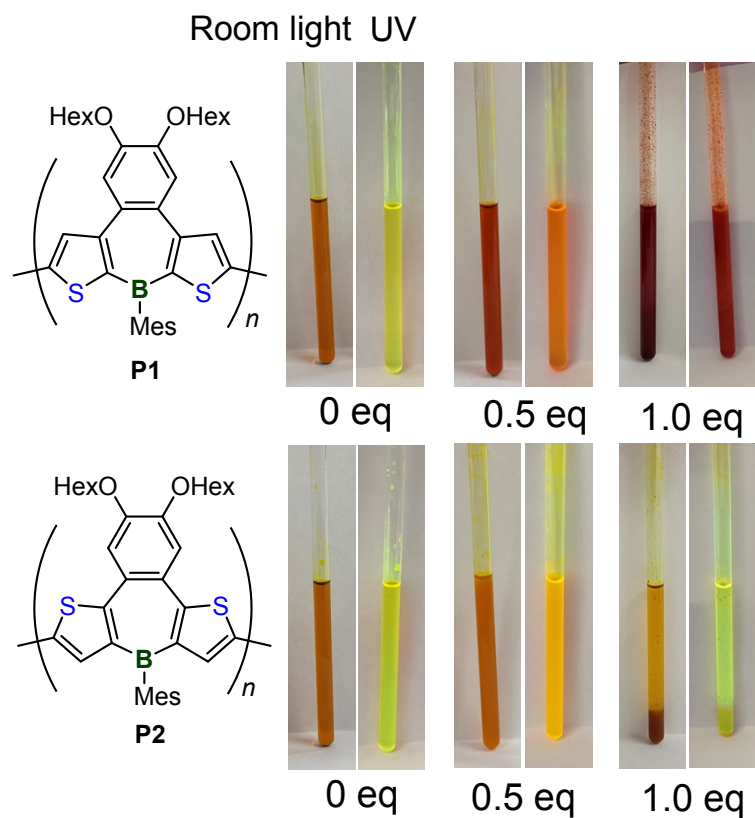

**Figure S13.** Photographs of NMR samples of **P1** and **P2** before and after the addition of TBACN in benzene- $d_6$ .

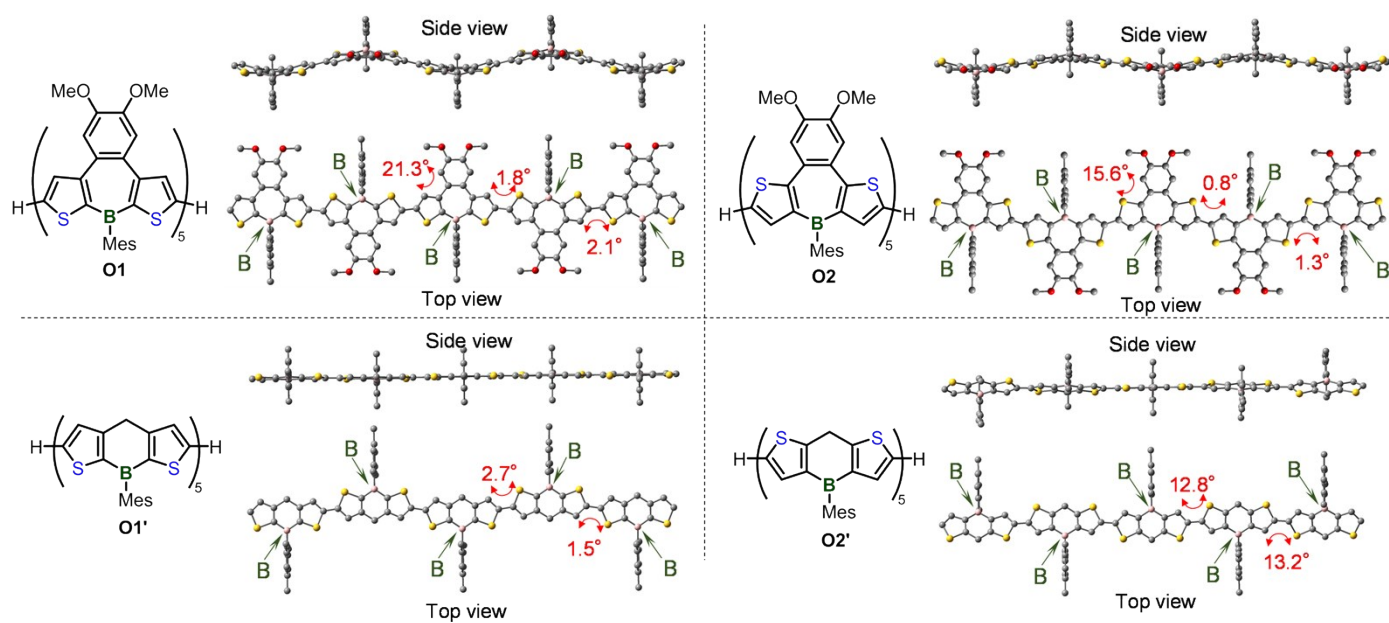

**Figure S14.** DFT-optimized geometries of **O1**, **O1'**, **O2**, and **O2'** calculated at the B3LYP/6-31G(d) level. Hydrogen atoms are omitted for clarity.



**Table S1.** TD-DFT data of the model compounds at the CAM-B3LYP/6-31G(d) level.

| Compound   | Excited state | Composition <sup>a</sup> | CI       | Excitation energy /eV | Wavelength /nm | Oscillator strength |          |      |     |      |
|------------|---------------|--------------------------|----------|-----------------------|----------------|---------------------|----------|------|-----|------|
| <b>O1</b>  | S0→S1         | H-7→L+2                  | -0.17341 | 2.97                  | 417            | 3.67                |          |      |     |      |
|            |               | H-6→L+1                  | -0.22909 |                       |                |                     |          |      |     |      |
|            |               | H-4→L                    | 0.12022  |                       |                |                     |          |      |     |      |
|            |               | H-1→L+1                  | 0.19301  |                       |                |                     |          |      |     |      |
|            |               | H→L                      | 0.54444  |                       |                |                     |          |      |     |      |
| <b>O2</b>  | S0→S1         | H-3→L+3                  | 0.15332  | 2.92                  | 425            | 3.78                |          |      |     |      |
|            |               | H-2→L+2                  | 0.21493  |                       |                |                     |          |      |     |      |
|            |               | H-1→L+1                  | -0.31471 |                       |                |                     |          |      |     |      |
|            |               | H→L                      | 0.52265  |                       |                |                     |          |      |     |      |
| <b>O1'</b> | S0→S1         | H-2→L+2                  | -0.18811 | 2.87                  | 432            | 3.84                |          |      |     |      |
|            |               | H-1→L+1                  | 0.30349  |                       |                |                     |          |      |     |      |
|            |               | H→L                      | 0.56696  |                       |                |                     |          |      |     |      |
| <b>O2'</b> | S0→S1         | H-3→L+1                  | 0.10309  | 3.90                  | 318            | 1.19                |          |      |     |      |
|            |               | H-3→L+3                  | -0.11048 |                       |                |                     |          |      |     |      |
|            |               | H-3→L+5                  | 0.23747  |                       |                |                     |          |      |     |      |
|            |               | H-2→L                    | 0.13239  |                       |                |                     |          |      |     |      |
|            |               | H-2→L+2                  | -0.21319 |                       |                |                     |          |      |     |      |
|            |               | H-2→L+6                  | 0.1459   |                       |                |                     |          |      |     |      |
|            |               | H-1→L+1                  | -0.30924 |                       |                |                     |          |      |     |      |
|            |               | H→L                      | 0.44322  |                       |                |                     |          |      |     |      |
|            |               | S0→S14                   | H-3→L+1  |                       |                |                     | 0.10651  | 4.31 | 287 | 3.27 |
|            |               |                          | H-3→L+5  |                       |                |                     | -0.27623 |      |     |      |
|            | H-2→L         |                          | 0.10007  |                       |                |                     |          |      |     |      |
|            | H-2→L+6       |                          | -0.26293 |                       |                |                     |          |      |     |      |
|            | H-1→L+7       | 0.27386                  |          |                       |                |                     |          |      |     |      |
|            | H→L           | 0.17071                  |          |                       |                |                     |          |      |     |      |
| H→L+8      | 0.32307       |                          |          |                       |                |                     |          |      |     |      |

<sup>a</sup> H and L denote HOMO and LUMO, respectively.

## **Experimental**

All reactions were carried out under dry argon. For the reaction solvents, toluene, diethyl ether, and THF were purchased from Kanto Chemical Co., Ltd. and were distilled from calcium hydride and stored over activated molecular sieves under argon until use, whereas chloroform was distilled from calcium hydride immediately before use. All other chemicals were purchased from FUJIFILM Wako Pure Chemical Industries, Ltd. and TCI Co., Ltd. Starting materials **1** and **5** were prepared according to the literature.<sup>[S1]</sup> Dimethoxy(mesityl)borane was prepared by a method similar to the synthesis of dimethoxy(triptyl)borane, using mesityl bromide instead of triptyl bromide.<sup>[S2]</sup> Microwave-assisted reactions were carried out using a Biotage Initiator+. TGA was carried out on a SII TG/DTA-6200 analyzer under a gentle nitrogen flow (30 mL/min) at a heating rate of 10 °C/min. Powder XRD patterns were obtained on a Rigaku Ultima IV multipurpose X-ray diffraction system. NMR spectra were recorded on Varian System 500 and 400MR spectrometers. High-resolution mass spectra were obtained on a Thermo Fisher Scientific LTQ Orbitrap XL spectrometer at N-BARD, Hiroshima University. Several compounds were purified by preparative gel permeation chromatography (GPC) using toluene as an eluent and serially connected Shodex KF2001 and KF2002 columns. UV-vis absorption spectra were measured with a Shimadzu UV-3600 plus spectrometer. Photoluminescence (PL) spectra were measured with a HORIBA FluoroMax-4 spectrophotometer. The absolute PL quantum yields were determined by using a HORIBA FluoroMax-4 spectrophotometer attached to an integration sphere. Titration experiments with TBACN were performed in ca. 0.1 mM toluene solutions for absorption and fluorescence measurements, whereas ca. 10 mM of benzene-*d*<sub>6</sub> solutions were used for the NMR experiments. The concentration of the polymer solutions was calculated based on the molecular weight of the monomer. In all the measurements, the samples were left for 3 minutes to equilibrate after each addition of cyanide. CVs were measured with an AMETEK VersaSTAT 4 potentiostat/galvanostat in a solution of 0.1 M tetrabutylammonium hexafluorophosphate in acetonitrile using a three-electrode system with a Pt plate counter electrode, a Pt wire working electrode, and an Ag/Ag<sup>+</sup> reference electrode. For the DFT calculations, all geometrical optimizations were performed on a Gaussian 16 program at the B3LYP/6-31G(d) level of theory. TD-DFT calculations of the optimized structures were carried out at the CAM-B3LYP/6-31G(d) level of theory.

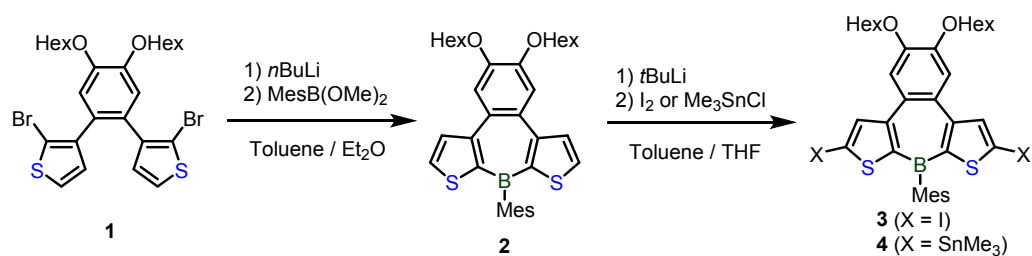

**Synthesis of 2.** To a solution of 4.90 g (8.16 mmol) of **1** in a mixed solvent of toluene (60 mL) and diethyl ether (15 mL) was slowly added 10.8 mL (16.7 mmol) of 1.55 M *n*BuLi in hexane at  $-80\text{ }^{\circ}\text{C}$  over 20 min, and the mixture was stirred at this temperature for 30 min. To this was added 1.72 g (8.96 mmol) of dimethoxy(mesityl)borane at this temperature, and the mixture was stirred at room temperature overnight. The resulting mixture was hydrolyzed with saturated ammonium chloride aqueous solution, and the organic layer was separated. The aqueous layer was extracted with toluene, and the combined organic layers were washed with saturated ammonium chloride solution then with brine. After drying over anhydrous magnesium sulfate, the solvent was evaporated. The residue was purified by silica gel chromatography (hexane/ $\text{CH}_2\text{Cl}_2 = 2/1$ ) to afford **2** in 63% yield (2.92 g, 5.12 mmol) as an off-white powder.  $^1\text{H}$  NMR (400 MHz,  $\text{CDCl}_3$ )  $\delta$ : 8.06 (2H, d,  $J = 5.2$  Hz, Th), 7.92 (2H, d,  $J = 5.2$  Hz, Th), 7.83 (2H, s, Bz), 6.93 (2H, s, Mes), 4.21 (4H, t,  $J = 6.6$  Hz, OHex), 2.39 (3H, s, Mes), 2.10 (6H, s), 1.98–1.89 (4H, m, OHex), 1.61–1.52 (4H, m, OHex), 1.44–1.35 (8H, m, OHex), 0.94 (6H, t,  $J = 7.0$  Hz, OHex).  $^{11}\text{B}$  NMR (160 MHz,  $\text{CDCl}_3$ )  $\delta$ : 49.8.  $^{13}\text{C}$  NMR (100 MHz,  $\text{CDCl}_3$ )  $\delta$ : 150.6, 148.5, 138.9, 137.4, 135.2, 130.9, 127.6, 127.1, 115.5, 69.3, 31.6, 29.3, 25.8, 22.8, 22.7, 21.4, 14.1. Two signals for B–C were not detected, probably due to their low intensity as a result of quadrupolar broadening. m.p.  $108.8\text{--}110.6\text{ }^{\circ}\text{C}$ . HR-MS(APCI) Calculated for  $\text{C}_{35}\text{H}_{44}\text{O}_2\text{BS}_2$   $[\text{M}+\text{H}]^+$ : 571.28703, Found: 571.28705.

**Synthesis of 3.** To a solution of 289 mg (0.506 mmol) of **2** in a mixed solvent of toluene (16 mL) and diethyl ether (4 mL) was slowly added 1.24 mL (2.00 mmol) of 1.61 M *t*BuLi in pentane at  $-80\text{ }^{\circ}\text{C}$  over 10 min, and the mixture was stirred at this temperature for 30 min. To this was added 8 mL of a toluene solution of elemental iodine ( $\text{I}_2$ , 533 mg, 2.10 mmol) at this temperature, and the mixture was stirred at room temperature

overnight. The resulting mixture was hydrolyzed with sodium thiosulfate aqueous solution, and the organic layer was separated. The aqueous layer was extracted with toluene, and the combined organic layers were washed with water then with brine. After drying over anhydrous magnesium sulfate, the solvent was evaporated. The residue was purified by silica gel chromatography (hexane/CH<sub>2</sub>Cl<sub>2</sub> = 3/1) to afford **3** in 55% yield (228 mg, 0.277 mmol) as an off-white powder. <sup>1</sup>H NMR (400 MHz, CDCl<sub>3</sub>) δ: 8.12 (2H, s, Th), 7.69 (2H, s, Bz), 6.92 (2H, s, Mes), 4.22 (4H, t, *J* = 6.5 Hz, OHex), 2.38 (3H, s, Mes), 2.09 (6H, s, Mes), 2.00–1.90 (4H, m, OHex), 1.62–1.54 (4H, m, OHex), 1.45–1.38 (8H, m, OHex), 0.95 (6H, t, *J* = 7.1 Hz, OHex). <sup>11</sup>B NMR (128 MHz, CDCl<sub>3</sub>) δ: 47.3. <sup>13</sup>C NMR (100 MHz, CDCl<sub>3</sub>) δ: 151.7, 149.8 (br, B–C), 148.9, 140.6, 138.9, 137.9, 127.2, 126.2, 115.0, 88.1, 69.3, 31.6, 29.2, 25.8, 22.8, 22.6, 21.4, 14.1. One signal for B–C was not detected, probably due to its low intensity as a result of quadrupolar broadening. m.p. 184.5–186.0 °C. HR-MS(APCI) Calculated for C<sub>35</sub>H<sub>41</sub>O<sub>2</sub>BI<sub>2</sub>S<sub>2</sub> [M]<sup>+</sup>: 822.07249, Found: 822.07330.

**Synthesis of 4.** Compound **4** was prepared from 295 mg (0.517 mmol) of **2**, 1.3 mL (2.1 mmol) of 1.61 M *t*BuLi in pentane, 443 mg (2.22 mmol) of trimethyltin chloride, 16 mL of toluene, and 4 mL of THF in a manner similar to that above. The crude product was purified by preparative GPC with toluene as the eluent to afford **4** as a light yellowish solid (327 mg, 0.365 mmol, 71% yield). <sup>1</sup>H NMR (400 MHz, CDCl<sub>3</sub>) δ: 8.11 (2H, s, Th), 7.92 (2H, s, Bz), 6.99 (2H, s, Mes), 4.28 (4H, t, *J* = 6.6 Hz, OHex), 2.45 (3H, s, Mes), 2.17 (6H, s, Mes), 2.04–1.93 (4H, m, OHex), 1.66–1.58 (4H, m, OHex), 1.50–1.39 (8H, m, OHex), 0.99 (6H, t, *J* = 7.1 Hz, OHex), 0.46 (18H, s, SnMe<sub>3</sub>). <sup>11</sup>B NMR (128 MHz, CDCl<sub>3</sub>) δ: 50.1. <sup>13</sup>C NMR (100 MHz, CDCl<sub>3</sub>) δ: 150.8, 150.2, 148.8 (br, B–C), 148.3, 141.8 (br, B–C), 138.7, 138.5, 137.0, 127.7, 127.0, 116.0, 69.5, 31.6, 29.3, 25.8, 22.9, 22.7, 21.5, 14.1, -8.1. m.p. 177.0–178.2 °C. HR-MS(APCI) Calculated for C<sub>41</sub>H<sub>60</sub>O<sub>2</sub>BS<sub>2</sub>Sn<sub>2</sub> [M+H]<sup>+</sup>: 899.21662, Found: 899.21869.

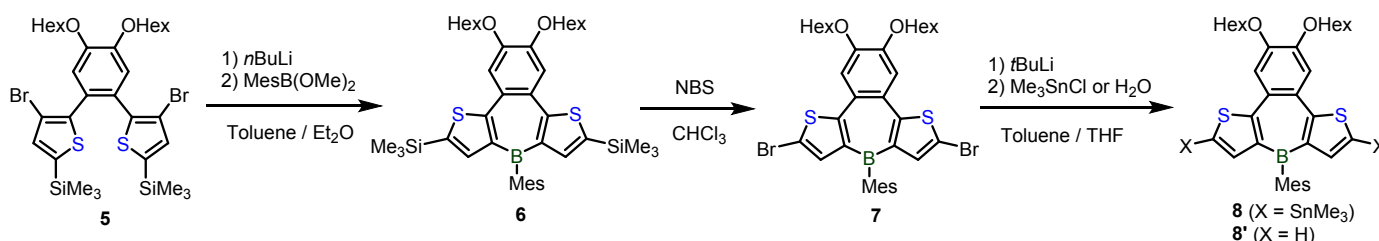

**Synthesis of 6.** Compound **6** was prepared from 3.61 g (4.85 mmol) of **5**, 6.34 mL (9.95 mmol) of 1.57 M *n*BuLi in hexane, 1.02 g (5.31 mmol) of dimethoxy(mesityl)borane, 20 mL of toluene, and 5 mL of diethyl ether in a manner similar to that of **2**. The crude product was purified by silica gel chromatography (hexane/CH<sub>2</sub>Cl<sub>2</sub> = 3/1) to afford **6** as a light yellowish solid (2.64 g, 3.69 mmol, 76% yield). <sup>1</sup>H NMR (400 MHz, CDCl<sub>3</sub>) δ: 7.85 (2H, s, Bz), 7.34 (2H, s, Th), 6.89 (2H, s, Mes), 4.22 (4H, t, *J* = 6.5 Hz, OHex), 2.39 (3H, s, Mes), 1.98 (6H, s, Mes), 1.99–1.88 (4H, m, OHex), 1.63–1.51 (4H, m, OHex), 1.44–1.36 (8H, m, OHex), 0.94 (6H, t, *J* = 7.1 Hz), 0.30 (18H, s, SiMe<sub>3</sub>). <sup>11</sup>B NMR (160 MHz, CDCl<sub>3</sub>) δ: 53.8. <sup>13</sup>C NMR (100 MHz, CDCl<sub>3</sub>) δ: 162.2, 149.3, 145.4 (br, B–C), 145.0, 144.2 (br, B–C), 137.5, 137.3, 135.8, 127.0, 125.0, 114.8, 69.1, 31.6, 29.1, 25.8, 22.7, 22.6, 21.2, 14.0, -0.1. HR-MS(APCI) Calculated for C<sub>41</sub>H<sub>60</sub>O<sub>2</sub>BS<sub>2</sub>Si<sub>2</sub> [M+H]<sup>+</sup>: 715.36608, Found: 715.36761.

**Synthesis of 7.** To a solution of 545 mg (0.762 mmol) of **6** in 70 mL of CHCl<sub>3</sub> was added 299.6 mg (1.68 mmol) of NBS in several portions at 0 °C, and the reaction mixture was stirred for 2 hours at room temperature. The resulting mixture was hydrolyzed, and the organic layer was separated. The aqueous layer was extracted with chloroform and the combined organic layers were washed with saturated ammonium chloride aqueous solution, water, then with brine. After drying over anhydrous magnesium sulfate, the solvent was evaporated. The residue was purified by silica gel chromatography (hexane/CH<sub>2</sub>Cl<sub>2</sub> = 1/1) to afford **7** in 48% yield (266 mg, 0.365 mmol) as a light yellowish powder. <sup>1</sup>H NMR (400 MHz, CDCl<sub>3</sub>) δ: 7.63 (2H, s, Bz), 7.14 (2H, s, Th), 6.91 (2H, s, Mes), 4.18 (4H, t, *J* = 6.6 Hz, OHex), 2.38 (3H, s, Mes), 1.97 (6H, s, Mes), 1.97–1.88 (4H, m, OHex), 1.58–1.51 (4H, m, OHex), 1.42–1.37 (8H, m, OHex), 0.94 (6H, t, *J* = 7.1 Hz, OHex). <sup>11</sup>B NMR (160 MHz, CDCl<sub>3</sub>) δ: 51.4. <sup>13</sup>C NMR (100 MHz, CDCl<sub>3</sub>) δ: 159.2, 149.8, 145.4 (br, B–C), 143.2 (br, B–C), 139.7, 137.4, 136.7, 127.2, 124.6, 113.6, 110.9, 69.3, 31.6, 29.0, 25.7, 22.7, 22.6, 21.2, 14.0. m.p. 165.4–166.1 °C. HR-MS(APCI) Calculated for C<sub>35</sub>H<sub>41</sub>O<sub>2</sub>BBr<sub>2</sub>S<sub>2</sub> [M]<sup>+</sup>: 726.10023, Found: 726.10089.

**Synthesis of 8.** To a solution of 147 mg (0.202 mmol) of **7** in a mixed solvent of toluene (8 mL) and THF (2 mL) was slowly added 0.27 mL (0.42 mmol) of 1.55 M *n*BuLi in hexane at –80 °C, and the mixture was

stirred at this temperature for 30 min. To this was added 88.2 mg (0.443 mmol) of trimethyltin chloride at this temperature, and the mixture was stirred at room temperature for 1 hour. The resulting mixture was hydrolyzed, and the organic layer was separated. The aqueous layer was extracted with toluene, and the combined organic layers were washed with saturated ammonium chloride aqueous solution, water, then with brine. After drying over anhydrous magnesium sulfate, the solvent was evaporated. The residue was purified by preparative GPC with toluene as the eluent to afford **8** in 33% yield (60.4 mg, 67.4  $\mu$ mol) as a light yellowish solid.  $^1\text{H}$  NMR (400 MHz,  $\text{CDCl}_3$ )  $\delta$ : 7.91 (2H, s, Bz), 7.34 (2H, s, Th), 6.93 (2H, s, Mes), 4.24 (4H, t,  $J = 6.6$  Hz, OHex), 2.42 (3H, s, Mes), 2.02 (6H, s, Mes), 2.00–1.91 (4H, m, OHex), 1.64–1.54 (4H, m, OHex), 1.46–1.38 (8H, m, OHex), 0.96 (6H, t,  $J = 7.0$  Hz, OHex), 0.38 (18H, s,  $\text{SnMe}_3$ ).  $^{11}\text{B}$  NMR (128 MHz,  $\text{CDCl}_3$ )  $\delta$ : 55.2.  $^{13}\text{C}$  NMR (100 MHz,  $\text{CDCl}_3$ )  $\delta$ : 162.8, 149.1, 146.2, 137.6, 135.8, 135.4, 126.9, 124.8, 114.8, 69.2, 31.6, 29.1, 25.8, 22.8, 22.6, 21.3, 14.0, -8.1. Two signals for B–C were not detected, probably due to their low intensity as a result of quadrupolar broadening. m.p. 156.8–157.5  $^\circ\text{C}$ . HR-MS(APCI) Calculated for  $\text{C}_{41}\text{H}_{59}\text{O}_2\text{BS}_2\text{Sn}_2$   $[\text{M}]^+$ : 898.20880, Found: 898.20972.

**Synthesis of 8'.** Compound **8'** was prepared from 364 mg (0.500 mmol) of **7**, 0.68 mL (1.0 mmol) of 1.55 M *n*BuLi in hexane, 20 mL of toluene, and 5 mL of THF in a manner similar to that of **8**. The lithiated solution was quenched with a few drops of saturated ammonium chloride aqueous solution instead of trimethyltin chloride. The crude product was purified by silica gel chromatography (hexane/ $\text{CH}_2\text{Cl}_2 = 4/1$ ) to afford **8'** as a light yellowish solid (247 mg, 0.433 mmol, 87% yield).  $^1\text{H}$  NMR (400 MHz,  $\text{CDCl}_3$ )  $\delta$ : 7.92 (2H, s, Bz), 7.30 (2H, d,  $J = 5.3$  Hz, Th), 7.28 (2H, d,  $J = 5.3$  Hz, Th), 6.93 (2H, s, Mes), 4.24 (4H, t,  $J = 6.6$  Hz, OHex), 2.41 (3H, s, Mes), 2.02 (6H, s, Mes), 2.00–1.91 (4H, m, OHex), 1.64–1.54 (4H, m, OHex), 1.46–1.39 (8H, m, OHex), 0.97 (6H, t,  $J = 7.1$  Hz, OHex).  $^{11}\text{B}$  NMR (128 MHz,  $\text{CDCl}_3$ )  $\delta$ : 53.2.  $^{13}\text{C}$  NMR (100 MHz,  $\text{CDCl}_3$ )  $\delta$ : 158.0, 149.3, 144.3 (br, B–C), 144.0 (br, B–C), 137.9, 137.5, 136.1, 127.0, 125.3, 122.7, 114.5, 69.2, 31.6, 29.1, 25.7, 22.6, 22.6, 21.2, 14.0. m.p. 131.8–132.6  $^\circ\text{C}$ . HR-MS(APCI) Calculated for  $\text{C}_{35}\text{H}_{44}\text{O}_2\text{BS}_2$   $[\text{M}+\text{H}]^+$ : 571.28703, Found: 571.28778.

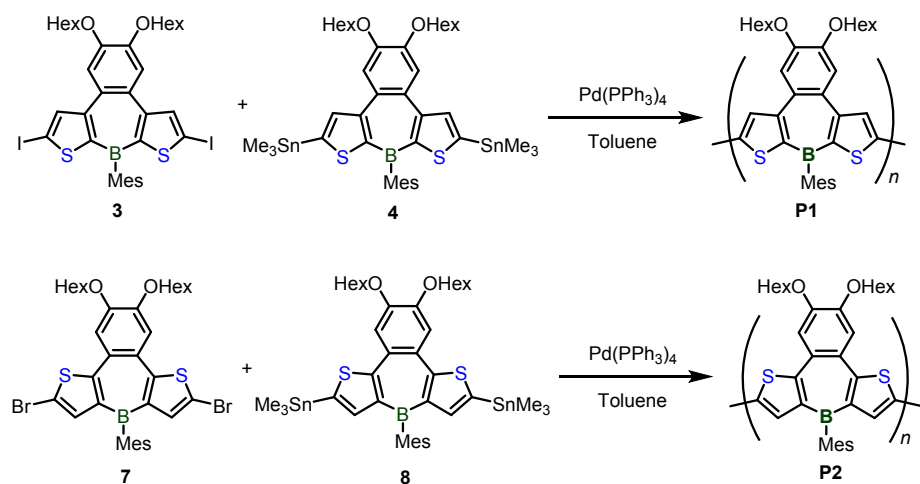

## Polymer Synthesis

A mixture of 100 mg (0.122 mmol) of **3**, 109 mg (0.122 mmol) of **4**, 10.0 mg (7 mol%) of Pd(PPh<sub>3</sub>)<sub>4</sub>, and 20 mL of toluene was heated to 140 °C for 1 hour in a microwave reactor. The mixture was cooled to room temperature and hydrolyzed, then the organic layer was separated. The organic layer was washed with water then brine. The residue was reprecipitated from 3 mL of chloroform into 100 mL of a 1:1 mixture of ethanol and acetone to give 71.3 mg (51% yield) of **P1** as a red powder: <sup>1</sup>H NMR (400 MHz, CDCl<sub>3</sub>) δ: 8.18 (2H, br s, Th), 7.74 (2H, br s, Bz), 6.99 (2H, br s, Mes), 4.23 (4H, t, *J* = 6.0 Hz, OHex), 2.44 (3H, br s, Mes), 2.15 (6H, br s, Mes), 1.97–1.87 (4H, m, OHex), 1.61–1.52 (4H, m, OHex), 1.44–1.33 (8H, m, OHex), 0.92 (6H, t, *J* = 6.7 Hz, OHex). <sup>11</sup>B NMR (160 MHz, CDCl<sub>3</sub>) δ: 39.3. *T*<sub>d</sub><sup>5</sup>: 196 °C.

Polymer **P2** was prepared from 73.3 mg (0.101 mmol) of **7** and 90.2 mg (0.101 mmol) of **8**, 5.8 mg (5 mol%) of Pd(PPh<sub>3</sub>)<sub>4</sub>, and 16 mL of toluene as an orangish powder (88.2 mg, 77% yield) in a manner similar to that above. The polymer was purified by reprecipitating from 3 mL of chloroform into 100 mL of a 1:1 mixture of hexane and ethanol: <sup>1</sup>H NMR (400 MHz, CDCl<sub>3</sub>) δ: 7.78 (2H, br s, Bz), 7.32 (2H, br s, Th), 6.99 (2H, br s, Mes), 4.26 (4H, br s, OHex), 2.48 (3H, br s, Mes), 2.08 (6H, br s, Mes), 2.04–1.87 (4H, m, OHex), 1.72–1.51 (4H, m, OHex), 1.53–1.28 (8H, m, OHex), 1.06–0.87 (6H, m, OHex). <sup>11</sup>B NMR (160 MHz, CDCl<sub>3</sub>) δ: 46.0. *T*<sub>d</sub><sup>5</sup>: 206 °C.

## References

[S1] J. G. Weis and T. M. Swager, *ACS Macro Lett.*, 2015, **4**, 138.

[S2] W.-M. Wan, F. Cheng and F. Jäkle, *Angew. Chem. Int. Ed.*, 2014, **53**, 8934.



## NMR spectra

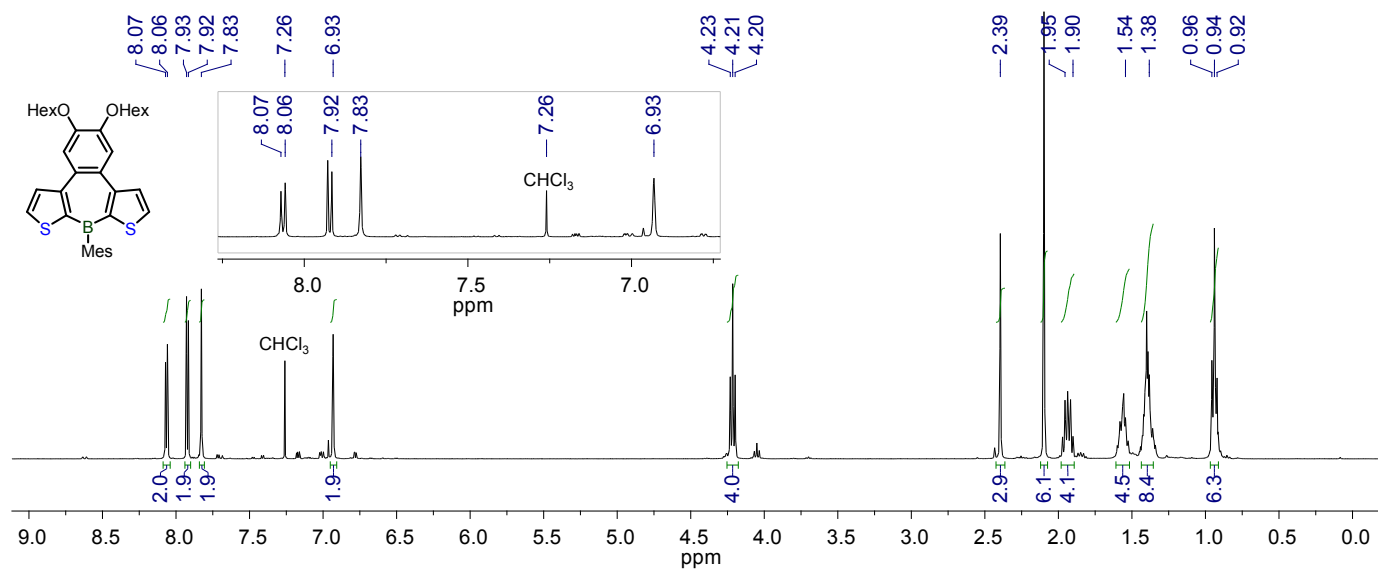

**Figure S15.** <sup>1</sup>H NMR spectrum of **2** in CDCl<sub>3</sub> at room temperature (400 MHz).

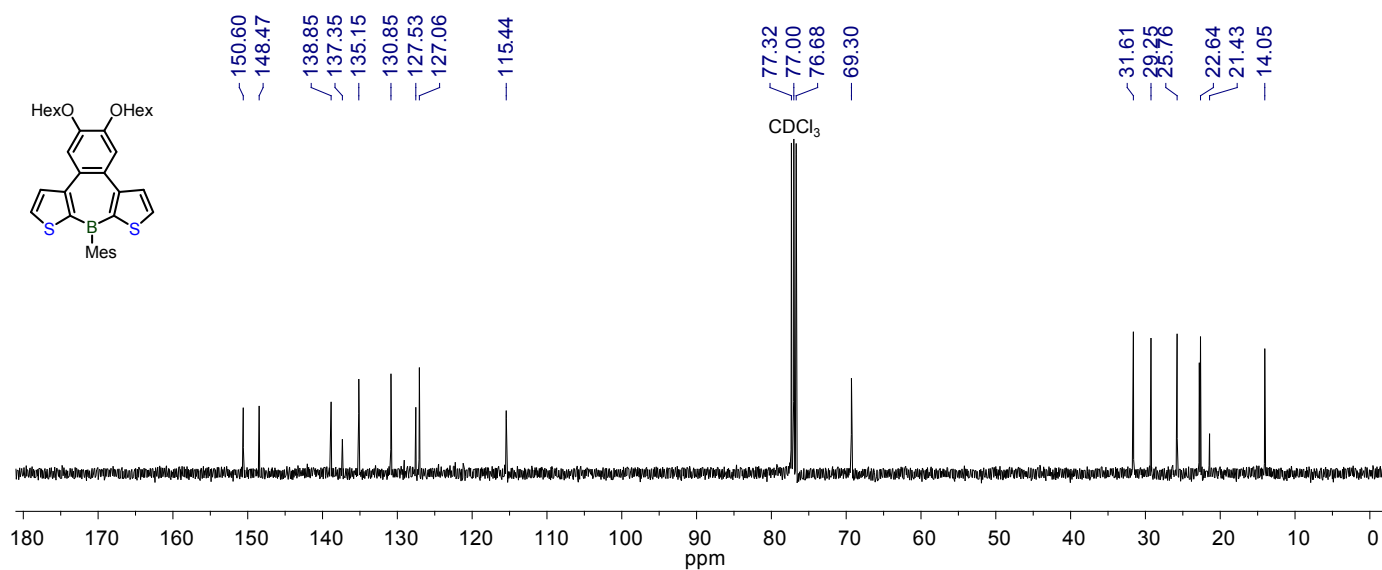

**Figure S16.** <sup>13</sup>C NMR spectrum of **2** in CDCl<sub>3</sub> at room temperature (100 MHz).

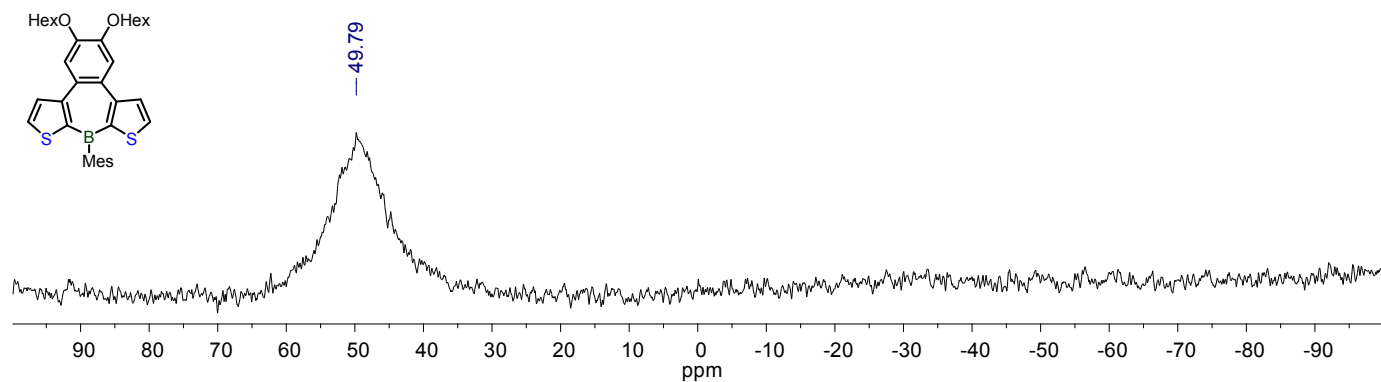

**Figure S17.**  $^{11}\text{B}$  NMR spectrum of **2** in  $\text{CDCl}_3$  at room temperature (160 MHz).

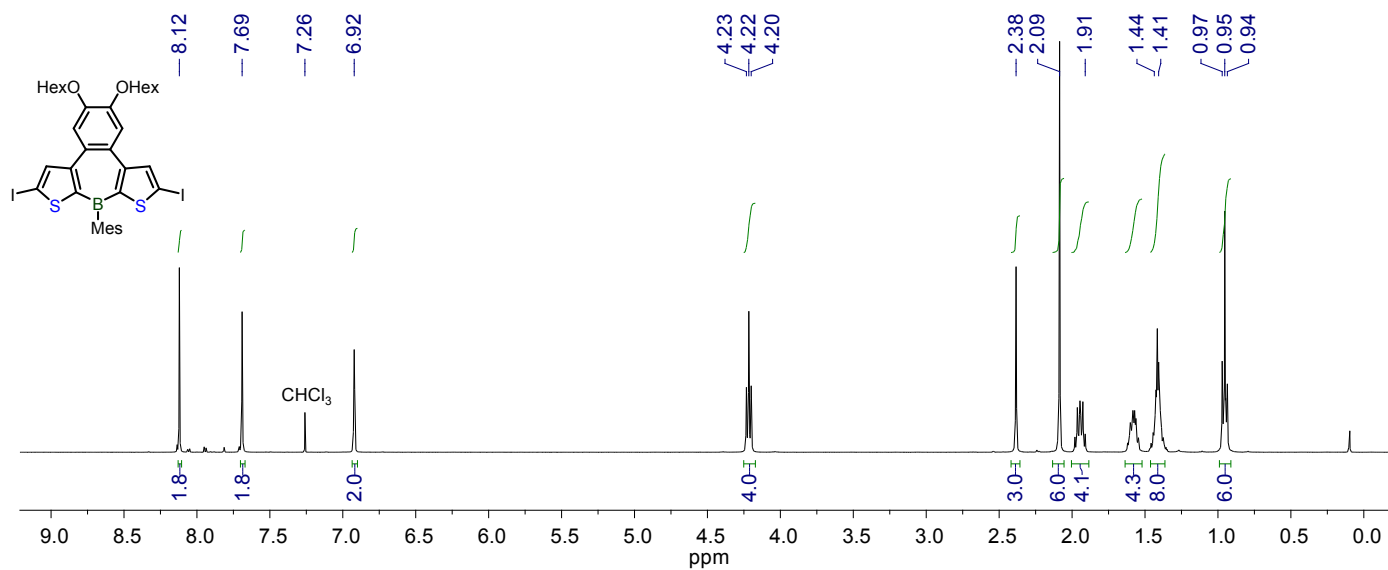

**Figure S18.**  $^1\text{H}$  NMR spectrum of **3** in  $\text{CDCl}_3$  at room temperature (400 MHz).

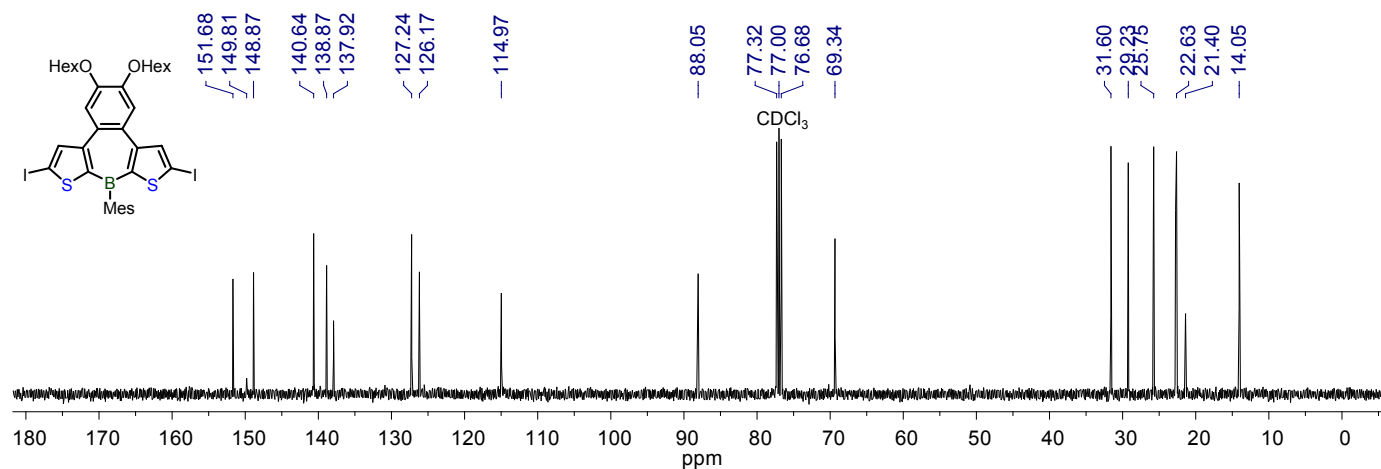

**Figure S19.**  $^{13}\text{C}$  NMR spectrum of **3** in  $\text{CDCl}_3$  at room temperature (100 MHz).

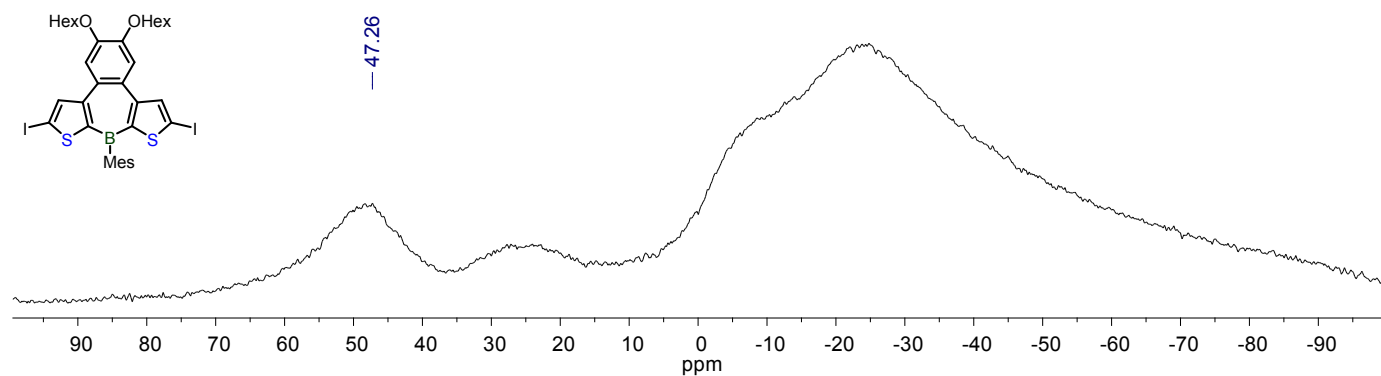

**Figure S20.**  $^{11}\text{B}$  NMR spectrum of **3** in  $\text{CDCl}_3$  at room temperature (128 MHz).

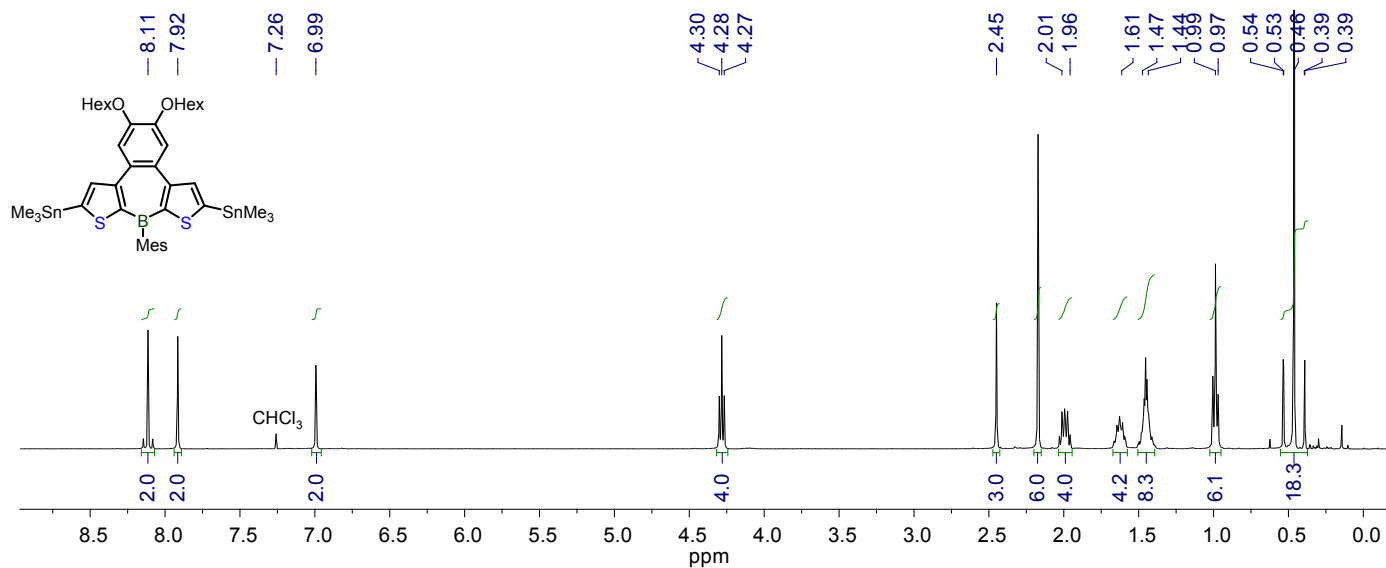

**Figure S21.**  $^1\text{H}$  NMR spectrum of **4** in  $\text{CDCl}_3$  at room temperature (400 MHz).

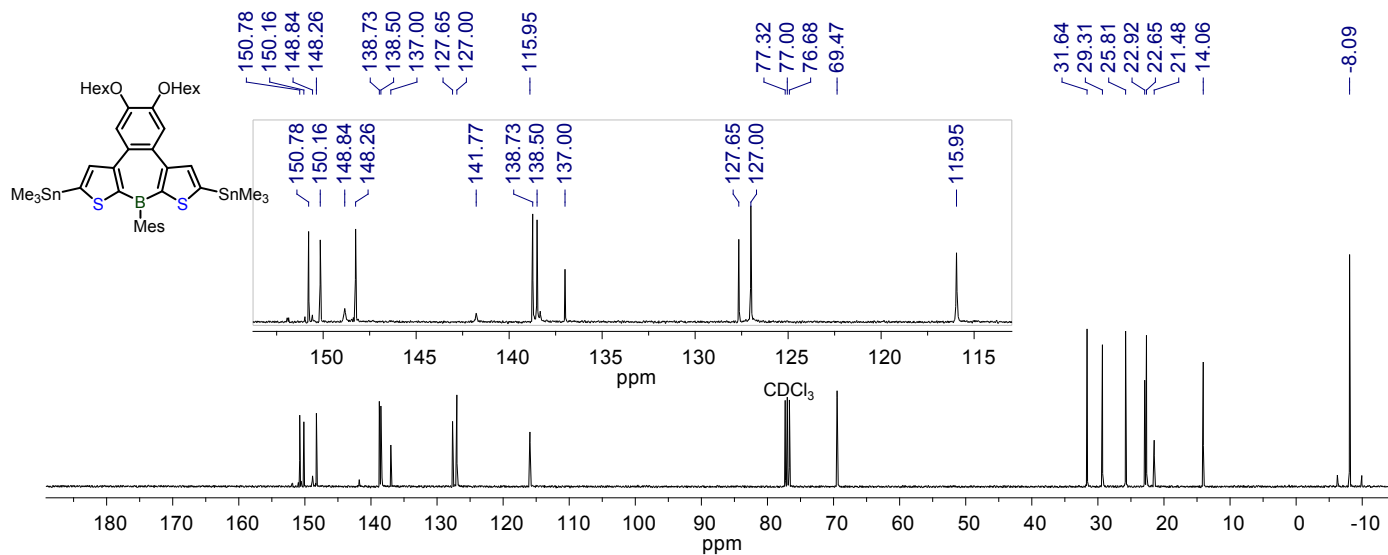

**Figure S22.**  $^{13}\text{C}$  NMR spectrum of **4** in  $\text{CDCl}_3$  at room temperature (100 MHz).

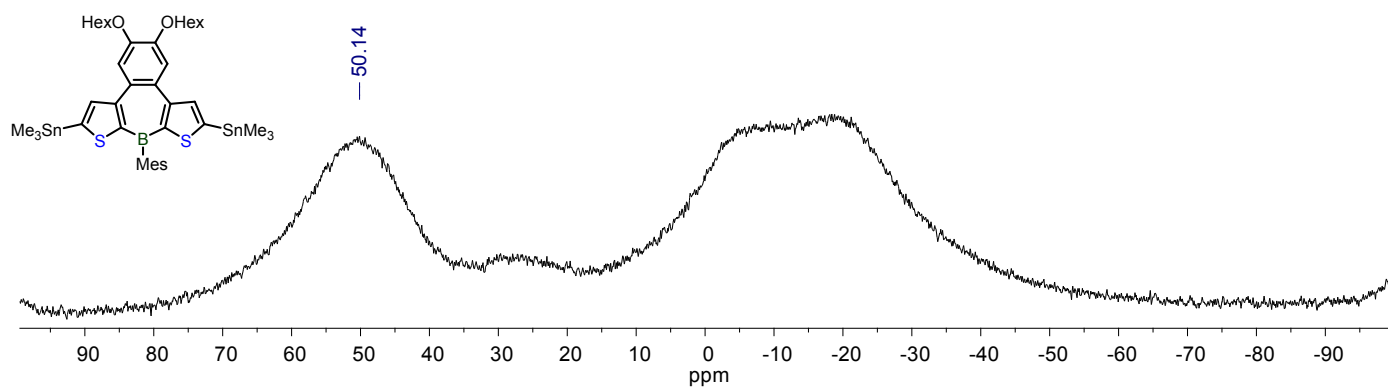

**Figure S23.**  $^{11}\text{B}$  NMR spectrum of **4** in  $\text{CDCl}_3$  at room temperature (128 MHz).

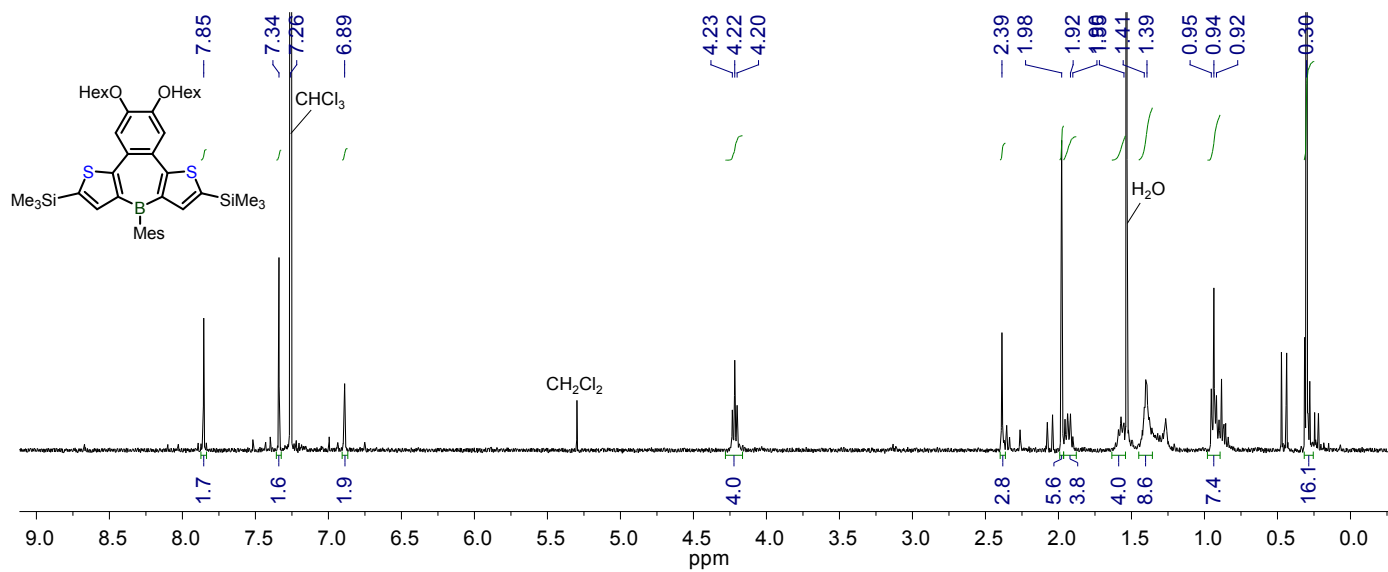

**Figure S24.**  $^1\text{H}$  NMR spectrum of **6** in  $\text{CDCl}_3$  at room temperature (400 MHz).

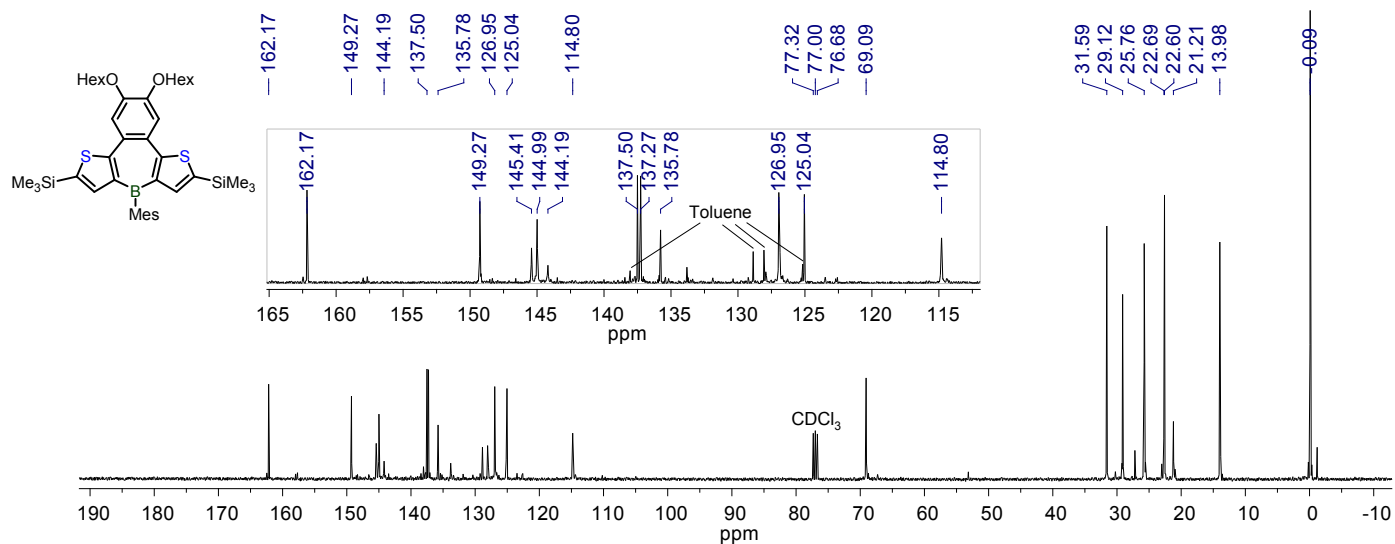

**Figure S25.**  $^{13}\text{C}$  NMR spectrum of **6** in  $\text{CDCl}_3$  at room temperature (100 MHz).

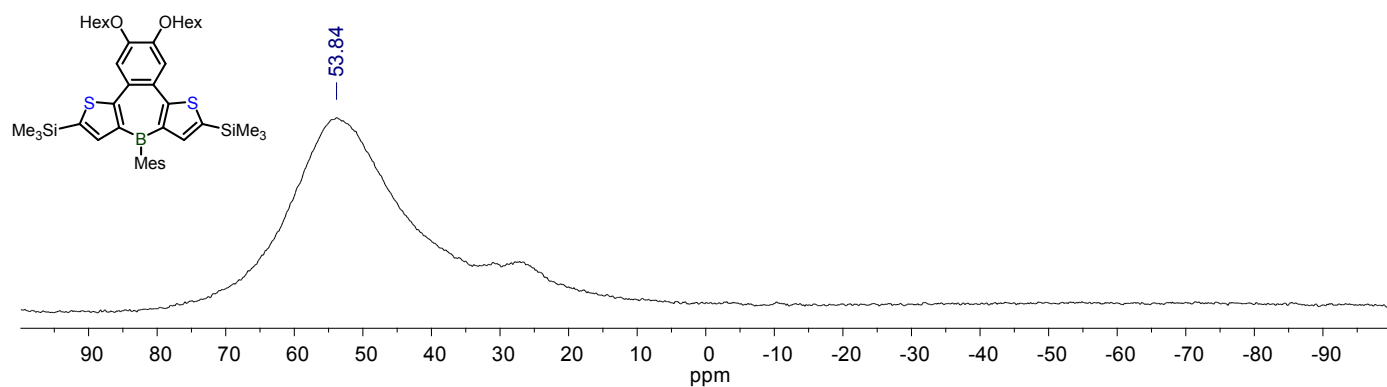

**Figure S26.**  $^{11}\text{B}$  NMR spectrum of **6** in  $\text{CDCl}_3$  at room temperature (160 MHz).

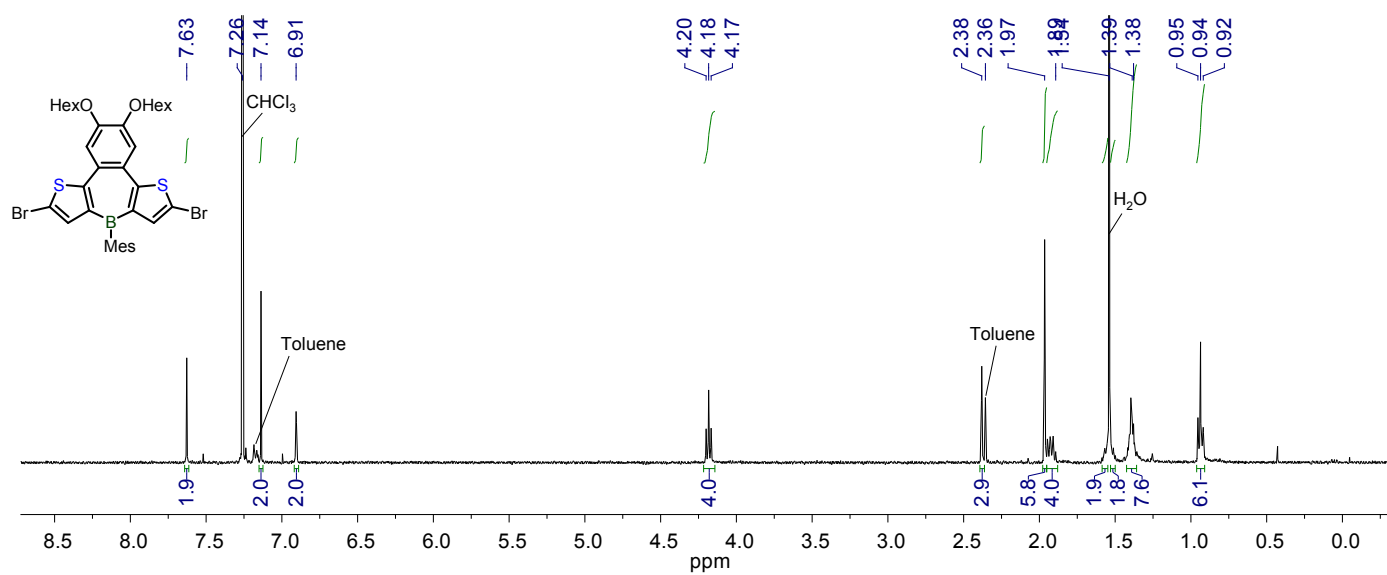

**Figure S27.**  $^1\text{H}$  NMR spectrum of **7** in  $\text{CDCl}_3$  at room temperature (400 MHz).

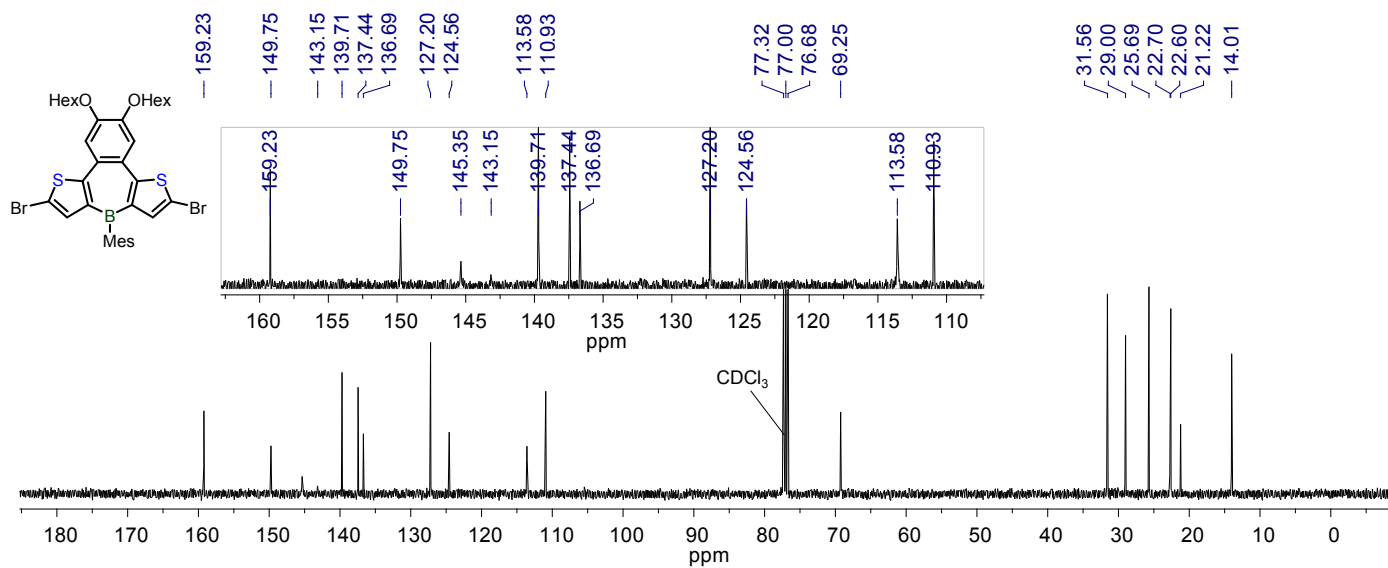

**Figure S28.**  $^{13}\text{C}$  NMR spectrum of **7** in  $\text{CDCl}_3$  at room temperature (100 MHz).

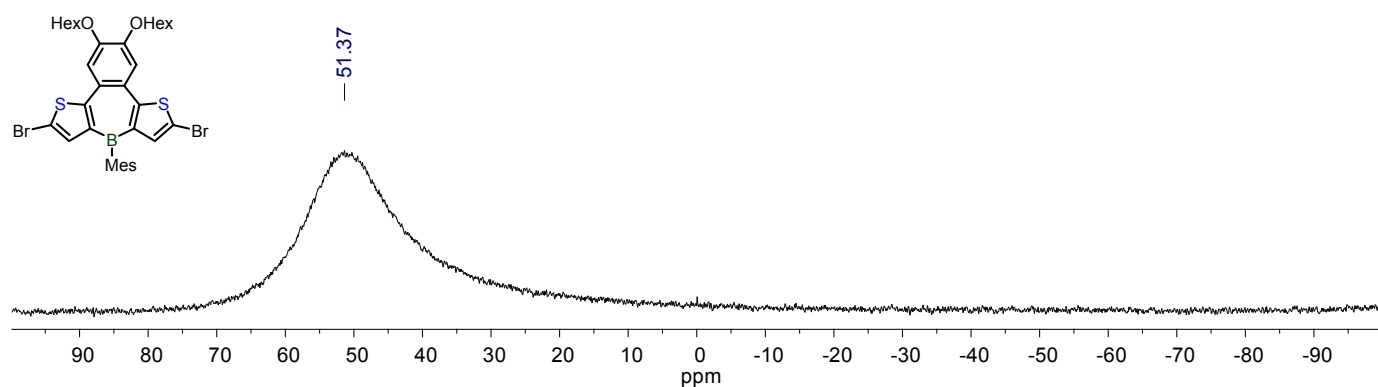

**Figure S29.**  $^{11}\text{B}$  NMR spectrum of **7** in  $\text{CDCl}_3$  at room temperature (160 MHz).

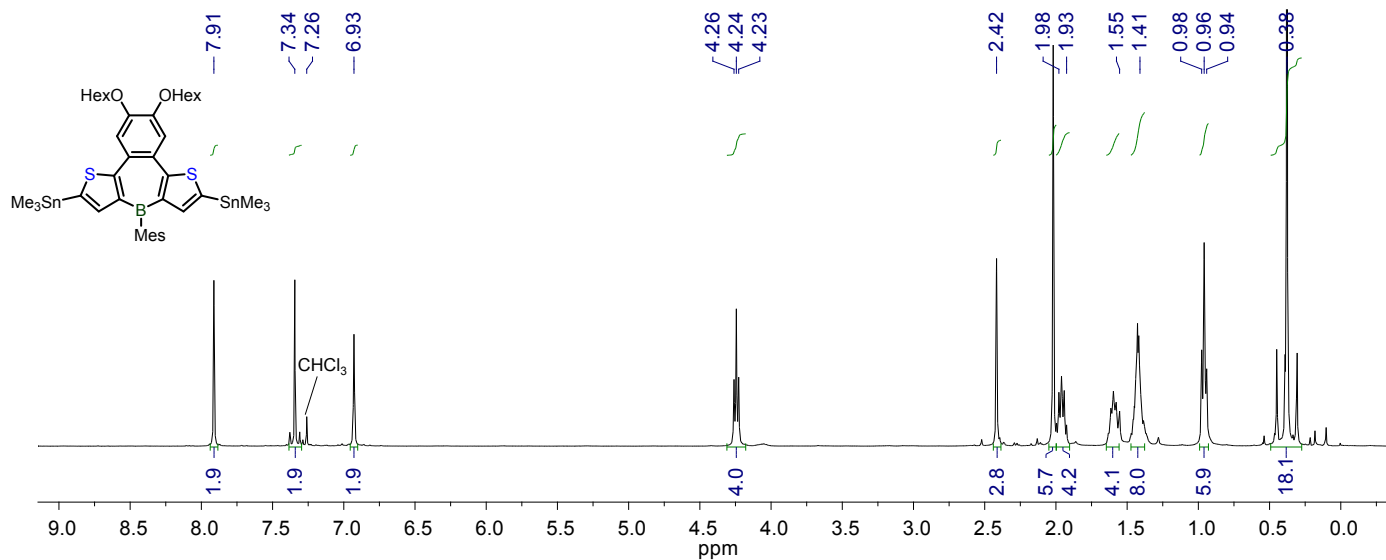

**Figure S30.**  $^1\text{H}$  NMR spectrum of **8** in  $\text{CDCl}_3$  at room temperature (400 MHz).

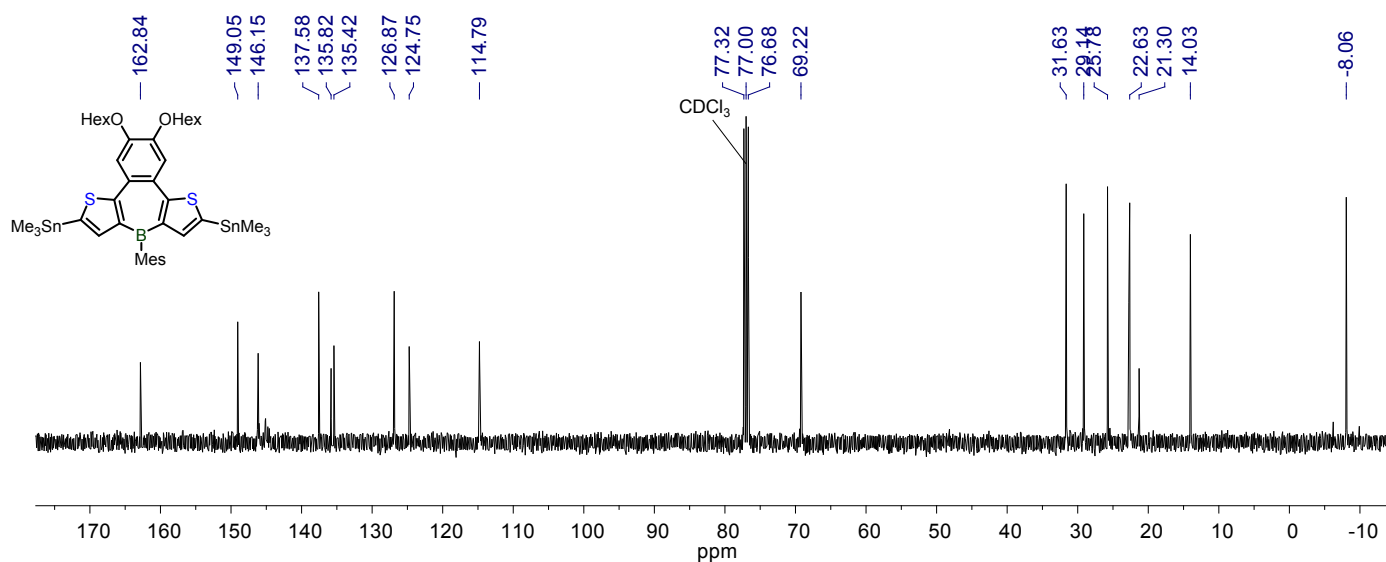

**Figure S31.**  $^{13}\text{C}$  NMR spectrum of **8** in  $\text{CDCl}_3$  at room temperature (100 MHz).

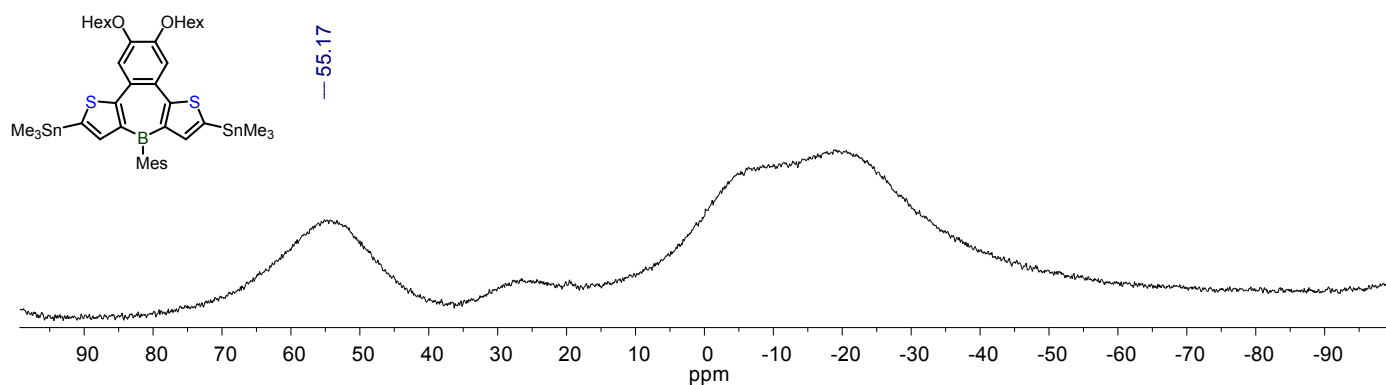

**Figure S32.**  $^{11}\text{B}$  NMR spectrum of **8** in  $\text{CDCl}_3$  at room temperature (128 MHz).

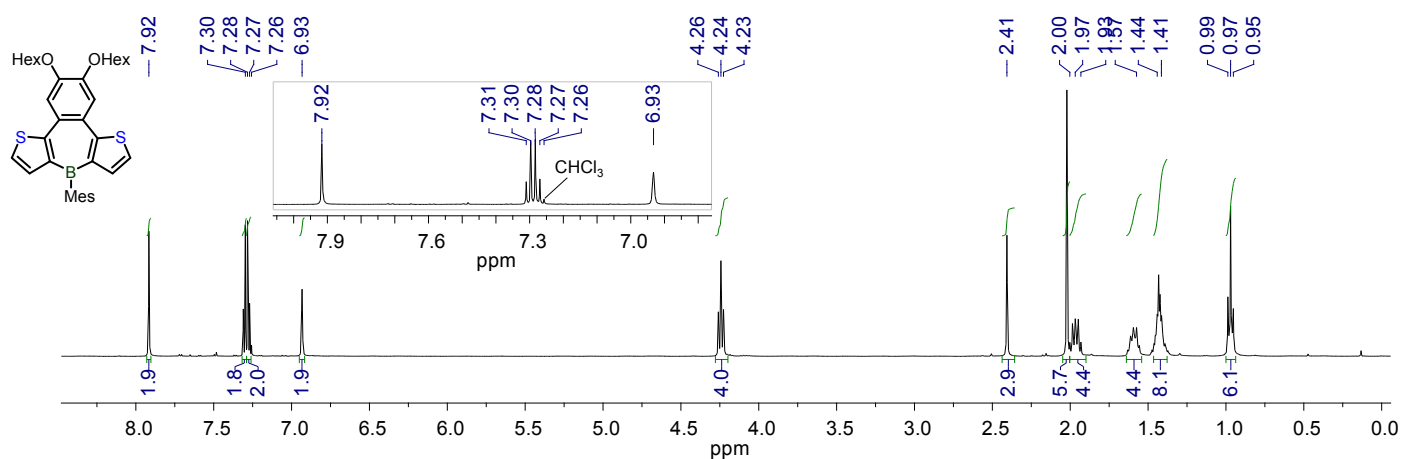

**Figure S33.**  $^1\text{H}$  NMR spectrum of **8'** in  $\text{CDCl}_3$  at room temperature (400 MHz).

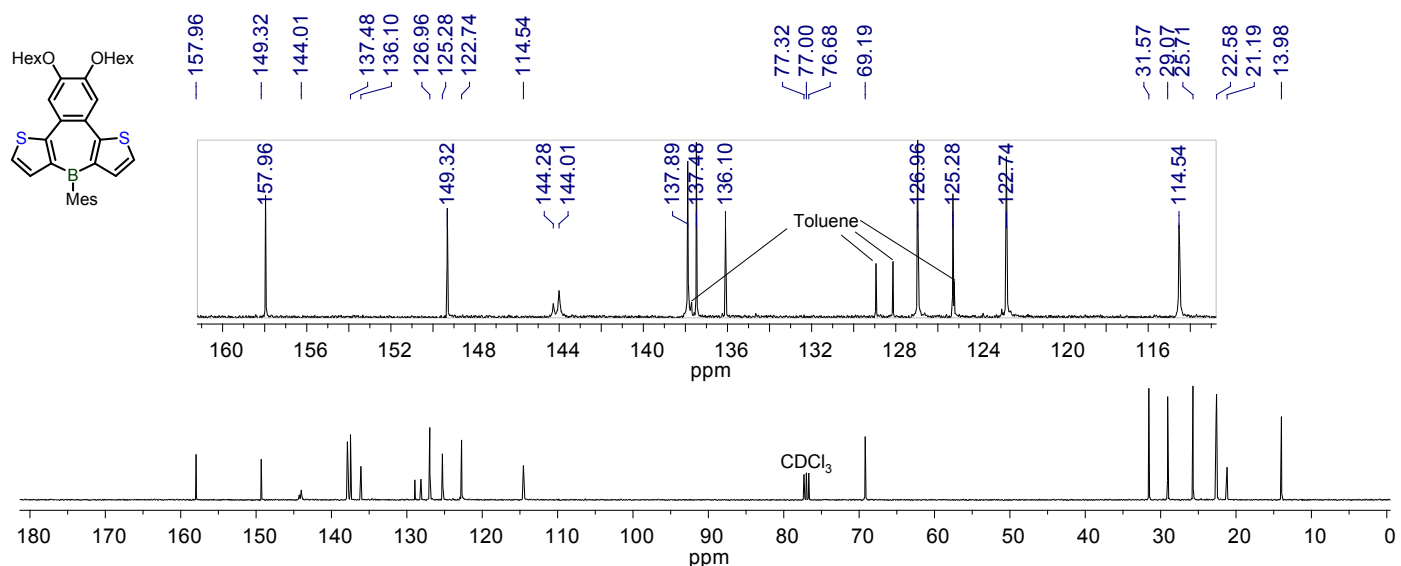

**Figure S34.**  $^{13}\text{C}$  NMR spectrum of **8'** in  $\text{CDCl}_3$  at room temperature (100 MHz).

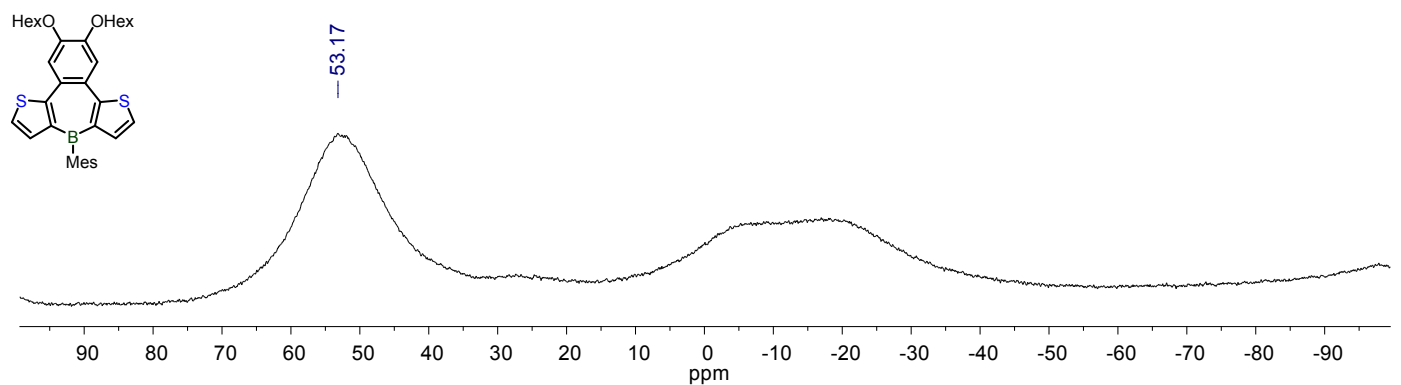

**Figure S35.**  $^{11}\text{B}$  NMR spectrum of **8'** in  $\text{CDCl}_3$  at room temperature (128 MHz).



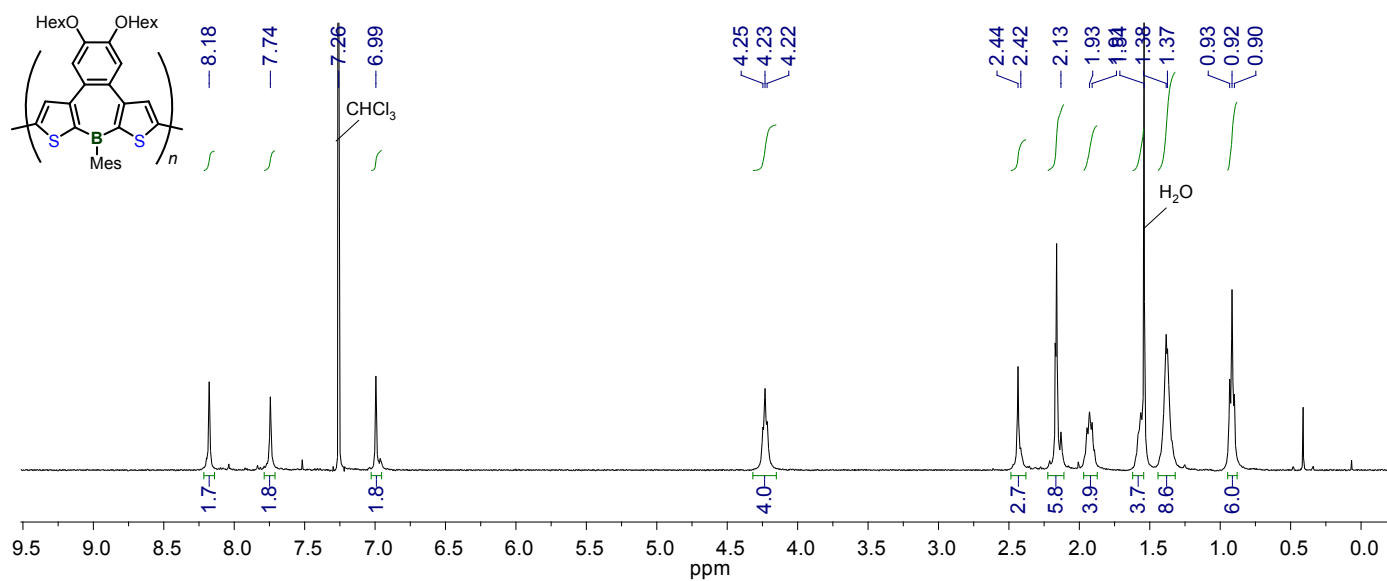

**Figure S36.** <sup>1</sup>H NMR spectrum of P1 in CDCl<sub>3</sub> at room temperature (400 MHz).

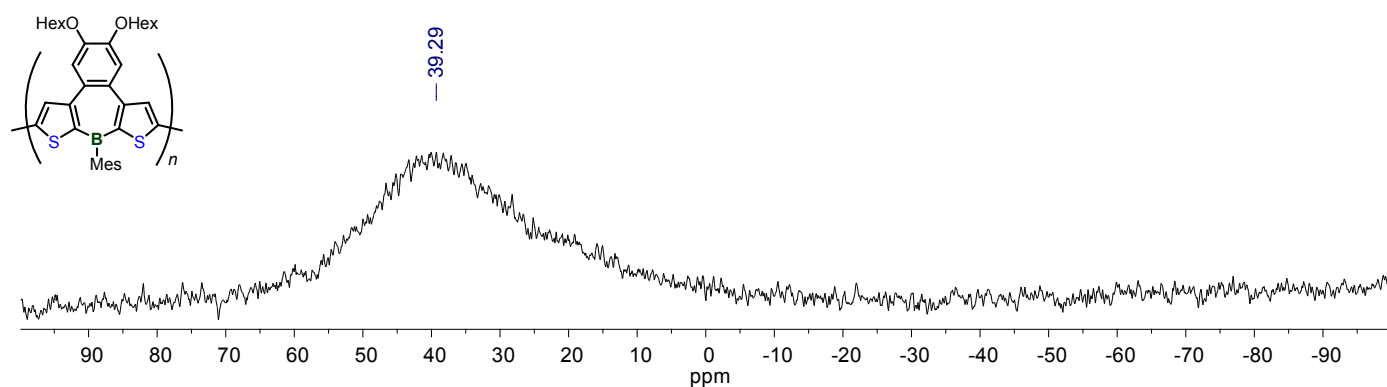

**Figure S37.** <sup>11</sup>B NMR spectrum of P1 in CDCl<sub>3</sub> at room temperature (160 MHz).

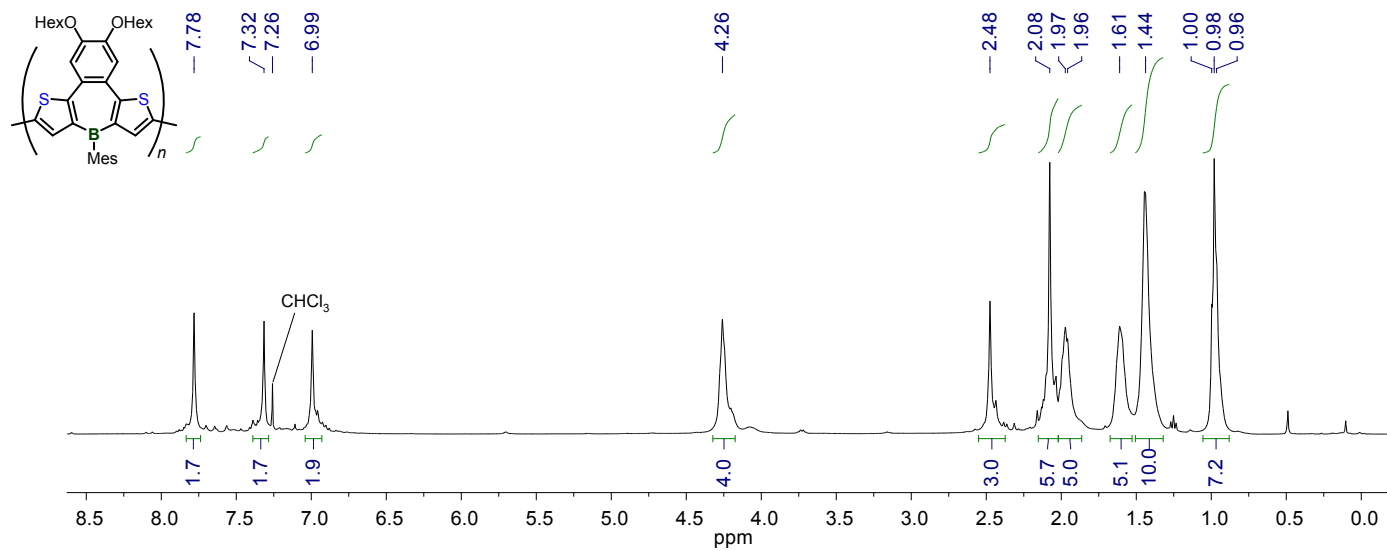

**Figure S38.**  $^1\text{H}$  NMR spectrum of **P2** in  $\text{CDCl}_3$  at room temperature (400 MHz).

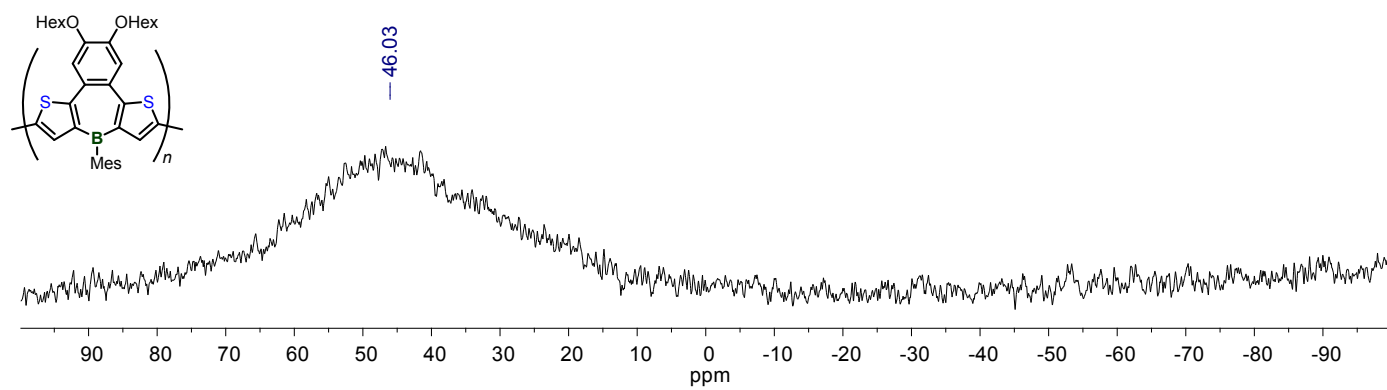

**Figure S39.**  $^{11}\text{B}$  NMR spectrum of **P2** in  $\text{CDCl}_3$  at room temperature (160 MHz).

Cartesian coordinates for optimized structures

**Table S2.** Coordinates for optimized structure of **O1** in the ground state ( $S_0$ ).

Total Energy: -9686.27159846 Hartree

# opt b3lyp/6-31g(d) geom=connectivity

| Center<br>Number | Atomic<br>Number | Atomic<br>Type | Coordinates (Angstroms) |           |            |
|------------------|------------------|----------------|-------------------------|-----------|------------|
|                  |                  |                | X                       | Y         | Z          |
| 1                | 6                | 0              | -0.303671               | 1.095112  | -7.532276  |
| 2                | 6                | 0              | 1.052137                | 0.872346  | -7.236548  |
| 3                | 6                | 0              | 2.202951                | 1.109431  | -8.125365  |
| 4                | 6                | 0              | 2.206407                | 1.105998  | -9.547995  |
| 5                | 6                | 0              | 1.060060                | 0.864947  | -10.441530 |
| 6                | 6                | 0              | -0.297262               | 1.089271  | -10.153874 |
| 7                | 6                | 0              | 3.431248                | 1.387016  | -7.465138  |
| 8                | 6                | 0              | 4.620741                | 1.633644  | -8.123097  |
| 9                | 6                | 0              | 4.624260                | 1.630110  | -9.541100  |
| 10               | 6                | 0              | 3.437926                | 1.380287  | -10.203565 |
| 11               | 1                | 0              | 3.426603                | 1.456306  | -6.387488  |
| 12               | 1                | 0              | 3.438518                | 1.444191  | -11.281545 |
| 13               | 5                | 0              | -1.046059               | 1.330180  | -8.845643  |
| 14               | 6                | 0              | -2.598847               | 1.663234  | -8.850183  |
| 15               | 6                | 0              | -3.589941               | 0.654153  | -8.851278  |
| 16               | 6                | 0              | -3.012903               | 3.017683  | -8.849793  |
| 17               | 6                | 0              | -4.944731               | 1.009643  | -8.853202  |
| 18               | 6                | 0              | -4.373307               | 3.334607  | -8.851488  |
| 19               | 6                | 0              | -5.359214               | 2.342674  | -8.856052  |
| 20               | 1                | 0              | -5.695605               | 0.220966  | -8.851569  |
| 21               | 1                | 0              | -4.671634               | 4.381992  | -8.848220  |
| 22               | 6                | 0              | -3.216026               | -0.814660 | -8.846420  |
| 23               | 1                | 0              | -2.612417               | -1.082132 | -9.721840  |
| 24               | 1                | 0              | -2.628935               | -1.080661 | -7.959312  |
| 25               | 1                | 0              | -4.109572               | -1.447545 | -8.854189  |
| 26               | 6                | 0              | -1.987620               | 4.132709  | -8.844493  |
| 27               | 1                | 0              | -1.338896               | 4.079971  | -7.961057  |
| 28               | 1                | 0              | -1.332554               | 4.081871  | -9.723355  |
| 29               | 1                | 0              | -2.469501               | 5.115731  | -8.845222  |
| 30               | 6                | 0              | -6.825543               | 2.707435  | -8.883247  |
| 31               | 1                | 0              | -7.048024               | 3.530046  | -8.193577  |
| 32               | 1                | 0              | -7.138032               | 3.035201  | -9.883912  |
| 33               | 1                | 0              | -7.455604               | 1.855563  | -8.606540  |
| 34               | 16               | 0              | -1.269918               | 0.884746  | -11.605473 |
| 35               | 16               | 0              | -1.284256               | 0.895609  | -6.085559  |
| 36               | 6                | 0              | 1.253894                | 0.462825  | -11.801339 |
| 37               | 6                | 0              | 1.238844                | 0.476576  | -5.873857  |
| 38               | 1                | 0              | 2.212327                | 0.162856  | -12.206909 |
| 39               | 1                | 0              | 2.195574                | 0.180599  | -5.461369  |
| 40               | 8                | 0              | 5.814385                | 1.908566  | -10.131917 |
| 41               | 8                | 0              | 5.808059                | 1.915191  | -7.527828  |
| 42               | 6                | 0              | 5.872555                | 1.924108  | -11.550467 |
| 43               | 1                | 0              | 6.911263                | 2.144796  | -11.801556 |
| 44               | 1                | 0              | 5.593653                | 0.950958  | -11.975301 |
| 45               | 1                | 0              | 5.223320                | 2.702605  | -11.972055 |
| 46               | 6                | 0              | 5.859196                | 1.938166  | -6.109291  |
| 47               | 1                | 0              | 5.578305                | 0.967198  | -5.680685  |
| 48               | 1                | 0              | 6.896626                | 2.160324  | -5.854163  |
| 49               | 1                | 0              | 5.207773                | 2.718750  | -5.694906  |

|     |    |   |           |           |            |
|-----|----|---|-----------|-----------|------------|
| 50  | 6  | 0 | 0.108405  | 0.423095  | -12.564054 |
| 51  | 6  | 0 | 0.089221  | 0.439919  | -5.117151  |
| 52  | 6  | 0 | -0.046027 | 0.066462  | -3.723992  |
| 53  | 16 | 0 | 1.324700  | -0.406524 | -2.760044  |
| 54  | 6  | 0 | -1.194022 | 0.041629  | -2.964268  |
| 55  | 6  | 0 | 0.345848  | -0.596406 | -1.310851  |
| 56  | 6  | 0 | -1.008222 | -0.358293 | -1.602701  |
| 57  | 1  | 0 | -2.148122 | 0.350328  | -3.373509  |
| 58  | 5  | 0 | 1.088888  | -0.842155 | 0.000000   |
| 59  | 6  | 0 | -2.159392 | -0.584087 | -0.711329  |
| 60  | 6  | 0 | 0.345848  | -0.596406 | 1.310851   |
| 61  | 6  | 0 | 2.638020  | -1.191416 | 0.000000   |
| 62  | 6  | 0 | -2.159392 | -0.584087 | 0.711329   |
| 63  | 6  | 0 | -3.392360 | -0.846225 | -1.369173  |
| 64  | 6  | 0 | -1.008222 | -0.358293 | 1.602701   |
| 65  | 16 | 0 | 1.324700  | -0.406524 | 2.760044   |
| 66  | 6  | 0 | 3.639116  | -0.193021 | 0.000000   |
| 67  | 6  | 0 | 3.038136  | -2.550616 | 0.000000   |
| 68  | 6  | 0 | -3.392360 | -0.846225 | 1.369173   |
| 69  | 6  | 0 | -4.582993 | -1.081070 | -0.708984  |
| 70  | 1  | 0 | -3.391079 | -0.912952 | -2.446979  |
| 71  | 6  | 0 | -1.194022 | 0.041629  | 2.964268   |
| 72  | 6  | 0 | -0.046027 | 0.066462  | 3.723992   |
| 73  | 6  | 0 | 4.990598  | -0.562797 | 0.000000   |
| 74  | 6  | 0 | 3.280927  | 1.279731  | 0.000000   |
| 75  | 6  | 0 | 4.394641  | -2.881589 | 0.000000   |
| 76  | 6  | 0 | 2.000956  | -3.654588 | 0.000000   |
| 77  | 6  | 0 | -4.582993 | -1.081070 | 0.708984   |
| 78  | 1  | 0 | -3.391079 | -0.912952 | 2.446979   |
| 79  | 8  | 0 | -5.774808 | -1.347800 | -1.302073  |
| 80  | 1  | 0 | -2.148122 | 0.350328  | 3.373509   |
| 81  | 6  | 0 | 5.391158  | -1.899526 | 0.000000   |
| 82  | 1  | 0 | 5.749624  | 0.217939  | 0.000000   |
| 83  | 1  | 0 | 2.688479  | 1.552924  | -0.881315  |
| 84  | 1  | 0 | 2.688479  | 1.552924  | 0.881315   |
| 85  | 1  | 0 | 4.181247  | 1.902986  | 0.000000   |
| 86  | 1  | 0 | 4.681948  | -3.932122 | 0.000000   |
| 87  | 1  | 0 | 1.349663  | -3.595819 | 0.881175   |
| 88  | 1  | 0 | 1.349663  | -3.595819 | -0.881175  |
| 89  | 1  | 0 | 2.472280  | -4.642706 | 0.000000   |
| 90  | 8  | 0 | -5.774808 | -1.347800 | 1.302073   |
| 91  | 6  | 0 | -5.829464 | -1.367005 | -2.720584  |
| 92  | 6  | 0 | 6.853295  | -2.281894 | 0.000000   |
| 93  | 6  | 0 | -5.829464 | -1.367005 | 2.720584   |
| 94  | 1  | 0 | -6.869894 | -1.577026 | -2.973765  |
| 95  | 1  | 0 | -5.538783 | -0.398272 | -3.147685  |
| 96  | 1  | 0 | -5.187737 | -2.153862 | -3.138189  |
| 97  | 1  | 0 | 7.111170  | -2.882626 | 0.881452   |
| 98  | 1  | 0 | 7.111170  | -2.882626 | -0.881452  |
| 99  | 1  | 0 | 7.498171  | -1.397103 | 0.000000   |
| 100 | 1  | 0 | -5.538783 | -0.398272 | 3.147685   |
| 101 | 1  | 0 | -6.869894 | -1.577026 | 2.973765   |
| 102 | 1  | 0 | -5.187737 | -2.153862 | 3.138189   |
| 103 | 6  | 0 | 0.089221  | 0.439919  | 5.117151   |
| 104 | 16 | 0 | -1.284256 | 0.895609  | 6.085559   |
| 105 | 6  | 0 | 1.238844  | 0.476576  | 5.873857   |
| 106 | 6  | 0 | -0.303671 | 1.095112  | 7.532276   |
| 107 | 6  | 0 | 1.052137  | 0.872346  | 7.236548   |
| 108 | 1  | 0 | 2.195574  | 0.180599  | 5.461369   |
| 109 | 5  | 0 | -1.046059 | 1.330180  | 8.845643   |
| 110 | 6  | 0 | 2.202951  | 1.109431  | 8.125365   |
| 111 | 6  | 0 | -0.297262 | 1.089271  | 10.153874  |

|     |    |   |           |           |            |
|-----|----|---|-----------|-----------|------------|
| 112 | 6  | 0 | -2.598847 | 1.663234  | 8.850183   |
| 113 | 6  | 0 | 2.206407  | 1.105998  | 9.547995   |
| 114 | 6  | 0 | 3.431248  | 1.387016  | 7.465138   |
| 115 | 6  | 0 | 1.060060  | 0.864947  | 10.441530  |
| 116 | 16 | 0 | -1.269918 | 0.884746  | 11.605473  |
| 117 | 6  | 0 | -3.589941 | 0.654153  | 8.851278   |
| 118 | 6  | 0 | -3.012903 | 3.017683  | 8.849793   |
| 119 | 6  | 0 | 3.437926  | 1.380287  | 10.203565  |
| 120 | 6  | 0 | 4.620741  | 1.633644  | 8.123097   |
| 121 | 1  | 0 | 3.426603  | 1.456306  | 6.387488   |
| 122 | 6  | 0 | 1.253894  | 0.462825  | 11.801339  |
| 123 | 6  | 0 | -4.944731 | 1.009643  | 8.853202   |
| 124 | 6  | 0 | -3.216026 | -0.814660 | 8.846420   |
| 125 | 6  | 0 | -4.373307 | 3.334607  | 8.851488   |
| 126 | 6  | 0 | -1.987620 | 4.132709  | 8.844493   |
| 127 | 6  | 0 | 4.624260  | 1.630110  | 9.541100   |
| 128 | 1  | 0 | 3.438518  | 1.444191  | 11.281545  |
| 129 | 8  | 0 | 5.808059  | 1.915191  | 7.527828   |
| 130 | 1  | 0 | 2.212327  | 0.162856  | 12.206909  |
| 131 | 6  | 0 | -5.359214 | 2.342674  | 8.856052   |
| 132 | 1  | 0 | -5.695605 | 0.220966  | 8.851569   |
| 133 | 1  | 0 | -2.628935 | -1.080661 | 7.959312   |
| 134 | 1  | 0 | -2.612417 | -1.082132 | 9.721840   |
| 135 | 1  | 0 | -4.109572 | -1.447545 | 8.854189   |
| 136 | 1  | 0 | -4.671634 | 4.381992  | 8.848220   |
| 137 | 1  | 0 | -1.332554 | 4.081871  | 9.723355   |
| 138 | 1  | 0 | -1.338896 | 4.079971  | 7.961057   |
| 139 | 1  | 0 | -2.469501 | 5.115731  | 8.845222   |
| 140 | 8  | 0 | 5.814385  | 1.908566  | 10.131917  |
| 141 | 6  | 0 | 5.859196  | 1.938166  | 6.109291   |
| 142 | 6  | 0 | -6.825543 | 2.707435  | 8.883247   |
| 143 | 6  | 0 | 5.872555  | 1.924108  | 11.550467  |
| 144 | 1  | 0 | 6.896626  | 2.160324  | 5.854163   |
| 145 | 1  | 0 | 5.578305  | 0.967198  | 5.680685   |
| 146 | 1  | 0 | 5.207773  | 2.718750  | 5.694906   |
| 147 | 1  | 0 | -7.138032 | 3.035201  | 9.883912   |
| 148 | 1  | 0 | -7.048024 | 3.530046  | 8.193577   |
| 149 | 1  | 0 | -7.455604 | 1.855563  | 8.606540   |
| 150 | 1  | 0 | 5.593653  | 0.950958  | 11.975301  |
| 151 | 1  | 0 | 6.911263  | 2.144796  | 11.801556  |
| 152 | 1  | 0 | 5.223320  | 2.702605  | 11.972055  |
| 153 | 6  | 0 | 0.108405  | 0.423095  | 12.564054  |
| 154 | 6  | 0 | -0.018936 | 0.042714  | -13.956321 |
| 155 | 16 | 0 | 1.363096  | -0.395241 | -14.920618 |
| 156 | 6  | 0 | -1.166521 | -0.014517 | -14.714594 |
| 157 | 6  | 0 | 0.388296  | -0.615452 | -16.367763 |
| 158 | 6  | 0 | -0.970712 | -0.412028 | -16.075831 |
| 159 | 1  | 0 | -2.128699 | 0.267644  | -14.304976 |
| 160 | 5  | 0 | 1.135956  | -0.846087 | -17.680571 |
| 161 | 6  | 0 | -2.115773 | -0.670374 | -16.966355 |
| 162 | 6  | 0 | 0.386724  | -0.613810 | -18.990791 |
| 163 | 6  | 0 | 2.690483  | -1.169119 | -17.676987 |
| 164 | 6  | 0 | -2.115737 | -0.668778 | -18.389033 |
| 165 | 6  | 0 | -3.340150 | -0.968007 | -16.307563 |
| 166 | 6  | 0 | -0.972215 | -0.409831 | -19.280182 |
| 167 | 16 | 0 | 1.358002  | -0.384797 | -20.441893 |
| 168 | 6  | 0 | 3.676646  | -0.155267 | -17.678636 |
| 169 | 6  | 0 | 3.110907  | -2.521346 | -17.664310 |
| 170 | 6  | 0 | -3.341851 | -0.964971 | -19.045861 |
| 171 | 6  | 0 | -4.523851 | -1.236897 | -16.967099 |
| 172 | 1  | 0 | -3.335866 | -1.035252 | -15.229735 |
| 173 | 6  | 0 | -1.169556 | -0.009037 | -20.648410 |

|     |    |   |           |           |            |
|-----|----|---|-----------|-----------|------------|
| 174 | 6  | 0 | -0.018328 | 0.046700  | -21.379325 |
| 175 | 6  | 0 | 5.032935  | -0.504069 | -17.666708 |
| 176 | 6  | 0 | 3.296818  | 1.311806  | -17.703900 |
| 177 | 6  | 0 | 4.472875  | -2.831702 | -17.654530 |
| 178 | 6  | 0 | 2.091038  | -3.641391 | -17.656404 |
| 179 | 6  | 0 | -4.524174 | -1.235910 | -18.384803 |
| 180 | 1  | 0 | -3.338679 | -1.029323 | -20.123836 |
| 181 | 8  | 0 | -5.707581 | -1.538507 | -16.373451 |
| 182 | 1  | 0 | -2.129240 | 0.271675  | -21.064239 |
| 183 | 1  | 0 | 0.084412  | 0.340557  | -22.416234 |
| 184 | 6  | 0 | 5.453869  | -1.835125 | -17.658685 |
| 185 | 1  | 0 | 5.779823  | 0.288336  | -17.664273 |
| 186 | 1  | 0 | 2.829579  | 1.589380  | -18.656803 |
| 187 | 1  | 0 | 2.582689  | 1.562925  | -16.911370 |
| 188 | 1  | 0 | 4.178097  | 1.948082  | -17.571767 |
| 189 | 1  | 0 | 4.776290  | -3.877540 | -17.640905 |
| 190 | 1  | 0 | 1.440366  | -3.588582 | -16.774305 |
| 191 | 1  | 0 | 1.437279  | -3.597225 | -18.536608 |
| 192 | 1  | 0 | 2.577805  | -4.622031 | -17.652269 |
| 193 | 8  | 0 | -5.709058 | -1.537767 | -18.977439 |
| 194 | 6  | 0 | -5.759930 | -1.561357 | -14.955052 |
| 195 | 6  | 0 | 6.922301  | -2.191670 | -17.676300 |
| 196 | 6  | 0 | -5.761695 | -1.566517 | -20.394713 |
| 197 | 1  | 0 | -5.496890 | -0.585254 | -14.526705 |
| 198 | 1  | 0 | -6.793507 | -1.801874 | -14.700798 |
| 199 | 1  | 0 | -5.095074 | -2.329759 | -14.539212 |
| 200 | 1  | 0 | 7.134417  | -3.054373 | -17.034335 |
| 201 | 1  | 0 | 7.257557  | -2.454399 | -18.688818 |
| 202 | 1  | 0 | 7.542021  | -1.355656 | -17.335025 |
| 203 | 1  | 0 | -6.794787 | -1.810131 | -20.648265 |
| 204 | 1  | 0 | -5.500869 | -0.591361 | -20.827282 |
| 205 | 1  | 0 | -5.095101 | -2.334988 | -20.808023 |
| 206 | 6  | 0 | -0.018936 | 0.042714  | 13.956321  |
| 207 | 16 | 0 | 1.363096  | -0.395241 | 14.920618  |
| 208 | 6  | 0 | -1.166521 | -0.014517 | 14.714594  |
| 209 | 6  | 0 | 0.388296  | -0.615452 | 16.367763  |
| 210 | 6  | 0 | -0.970712 | -0.412028 | 16.075831  |
| 211 | 1  | 0 | -2.128699 | 0.267644  | 14.304976  |
| 212 | 5  | 0 | 1.135956  | -0.846087 | 17.680571  |
| 213 | 6  | 0 | -2.115773 | -0.670374 | 16.966355  |
| 214 | 6  | 0 | 0.386724  | -0.613810 | 18.990791  |
| 215 | 6  | 0 | 2.690483  | -1.169119 | 17.676987  |
| 216 | 6  | 0 | -2.115737 | -0.668778 | 18.389033  |
| 217 | 6  | 0 | -3.340150 | -0.968007 | 16.307563  |
| 218 | 6  | 0 | -0.972215 | -0.409831 | 19.280182  |
| 219 | 16 | 0 | 1.358002  | -0.384797 | 20.441893  |
| 220 | 6  | 0 | 3.676646  | -0.155267 | 17.678636  |
| 221 | 6  | 0 | 3.110907  | -2.521346 | 17.664310  |
| 222 | 6  | 0 | -3.341851 | -0.964971 | 19.045861  |
| 223 | 6  | 0 | -4.523851 | -1.236897 | 16.967099  |
| 224 | 1  | 0 | -3.335866 | -1.035252 | 15.229735  |
| 225 | 6  | 0 | -1.169556 | -0.009037 | 20.648410  |
| 226 | 6  | 0 | 5.032935  | -0.504069 | 17.666708  |
| 227 | 6  | 0 | 3.296818  | 1.311806  | 17.703900  |
| 228 | 6  | 0 | 4.472875  | -2.831702 | 17.654530  |
| 229 | 6  | 0 | 2.091038  | -3.641391 | 17.656404  |
| 230 | 6  | 0 | -4.524174 | -1.235910 | 18.384803  |
| 231 | 1  | 0 | -3.338679 | -1.029323 | 20.123836  |
| 232 | 8  | 0 | -5.707581 | -1.538507 | 16.373451  |
| 233 | 1  | 0 | -2.129240 | 0.271675  | 21.064239  |
| 234 | 6  | 0 | 5.453869  | -1.835125 | 17.658685  |
| 235 | 1  | 0 | 5.779823  | 0.288336  | 17.664273  |

|     |   |   |           |           |           |
|-----|---|---|-----------|-----------|-----------|
| 236 | 1 | 0 | 2.582689  | 1.562925  | 16.911370 |
| 237 | 1 | 0 | 2.829579  | 1.589380  | 18.656803 |
| 238 | 1 | 0 | 4.178097  | 1.948082  | 17.571767 |
| 239 | 1 | 0 | 4.776290  | -3.877540 | 17.640905 |
| 240 | 1 | 0 | 1.437279  | -3.597225 | 18.536608 |
| 241 | 1 | 0 | 1.440366  | -3.588582 | 16.774305 |
| 242 | 1 | 0 | 2.577805  | -4.622031 | 17.652269 |
| 243 | 8 | 0 | -5.709058 | -1.537767 | 18.977439 |
| 244 | 6 | 0 | -5.759930 | -1.561357 | 14.955052 |
| 245 | 6 | 0 | 6.922301  | -2.191670 | 17.676300 |
| 246 | 6 | 0 | -5.761695 | -1.566517 | 20.394713 |
| 247 | 1 | 0 | -6.793507 | -1.801874 | 14.700798 |
| 248 | 1 | 0 | -5.496890 | -0.585254 | 14.526705 |
| 249 | 1 | 0 | -5.095074 | -2.329759 | 14.539212 |
| 250 | 1 | 0 | 7.257557  | -2.454399 | 18.688818 |
| 251 | 1 | 0 | 7.134417  | -3.054373 | 17.034335 |
| 252 | 1 | 0 | 7.542021  | -1.355656 | 17.335025 |
| 253 | 1 | 0 | -5.500869 | -0.591361 | 20.827282 |
| 254 | 1 | 0 | -6.794787 | -1.810131 | 20.648265 |
| 255 | 1 | 0 | -5.095101 | -2.334988 | 20.808023 |
| 256 | 6 | 0 | -0.018328 | 0.046700  | 21.379325 |
| 257 | 1 | 0 | 0.084412  | 0.340557  | 22.416234 |

**Table S3.** Coordinates for optimized structure of **O2** in the ground state ( $S_0$ ).

Total Energy: -9686.24474719 Hartree

# opt b3lyp/6-31g(d) geom=connectivity

| Center<br>Number | Atomic<br>Number | Atomic<br>Type | Coordinates (Angstroms) |           |           |
|------------------|------------------|----------------|-------------------------|-----------|-----------|
|                  |                  |                | X                       | Y         | Z         |
| 1                | 16               | 0              | -1.732225               | -0.204435 | 3.275777  |
| 2                | 6                | 0              | 0.682647                | 0.259546  | 2.553196  |
| 3                | 6                | 0              | -1.451520               | 0.204129  | 1.576602  |
| 4                | 6                | 0              | -0.080493               | 0.395553  | 1.345538  |
| 5                | 1                | 0              | 1.758164                | 0.399639  | 2.563450  |
| 6                | 6                | 0              | -2.615757               | 0.349599  | 0.715280  |
| 7                | 5                | 0              | 0.626107                | 0.635480  | 0.000000  |
| 8                | 6                | 0              | -2.615757               | 0.349599  | -0.715280 |
| 9                | 6                | 0              | -3.873975               | 0.491987  | 1.369411  |
| 10               | 6                | 0              | -0.080493               | 0.395553  | -1.345538 |
| 11               | 6                | 0              | 2.170430                | 1.009428  | 0.000000  |
| 12               | 6                | 0              | -1.451520               | 0.204129  | -1.576602 |
| 13               | 6                | 0              | -3.873975               | 0.491987  | -1.369411 |
| 14               | 6                | 0              | -5.080133               | 0.600780  | 0.710776  |
| 15               | 1                | 0              | -3.882360               | 0.550873  | 2.448978  |
| 16               | 6                | 0              | 0.682647                | 0.259546  | -2.553196 |
| 17               | 6                | 0              | 3.174732                | 0.016148  | 0.000000  |
| 18               | 6                | 0              | 2.565633                | 2.368216  | 0.000000  |
| 19               | 16               | 0              | -1.732225               | -0.204435 | -3.275777 |
| 20               | 6                | 0              | -5.080133               | 0.600780  | -0.710776 |
| 21               | 1                | 0              | -3.882360               | 0.550873  | -2.448978 |
| 22               | 8                | 0              | -6.291586               | 0.742943  | 1.301895  |
| 23               | 1                | 0              | 1.758164                | 0.399639  | -2.563450 |
| 24               | 6                | 0              | 4.526027                | 0.387581  | 0.000000  |
| 25               | 6                | 0              | 2.809267                | -1.454777 | 0.000000  |
| 26               | 6                | 0              | 3.921816                | 2.703996  | 0.000000  |
| 27               | 6                | 0              | 1.523000                | 3.467190  | 0.000000  |
| 28               | 8                | 0              | -6.291586               | 0.742943  | -1.301895 |

|    |    |   |           |           |            |
|----|----|---|-----------|-----------|------------|
| 29 | 6  | 0 | -6.348343 | 0.754686  | 2.721740   |
| 30 | 6  | 0 | 4.922353  | 1.725983  | 0.000000   |
| 31 | 1  | 0 | 5.286818  | -0.391704 | 0.000000   |
| 32 | 1  | 0 | 2.212247  | -1.724144 | 0.880320   |
| 33 | 1  | 0 | 2.212247  | -1.724144 | -0.880320  |
| 34 | 1  | 0 | 3.703829  | -2.086233 | 0.000000   |
| 35 | 1  | 0 | 4.205245  | 3.755707  | 0.000000   |
| 36 | 1  | 0 | 0.871785  | 3.404490  | -0.881191  |
| 37 | 1  | 0 | 0.871785  | 3.404490  | 0.881191   |
| 38 | 1  | 0 | 1.987974  | 4.458397  | 0.000000   |
| 39 | 6  | 0 | -6.348343 | 0.754686  | -2.721740  |
| 40 | 1  | 0 | -7.404980 | 0.856066  | 2.974016   |
| 41 | 1  | 0 | -5.958197 | -0.179181 | 3.146248   |
| 42 | 1  | 0 | -5.790767 | 1.603291  | 3.138753   |
| 43 | 6  | 0 | 6.383380  | 2.113682  | 0.000000   |
| 44 | 1  | 0 | -5.958197 | -0.179181 | -3.146248  |
| 45 | 1  | 0 | -7.404980 | 0.856066  | -2.974016  |
| 46 | 1  | 0 | -5.790767 | 1.603291  | -3.138753  |
| 47 | 1  | 0 | 6.640072  | 2.715242  | -0.881310  |
| 48 | 1  | 0 | 6.640072  | 2.715242  | 0.881310   |
| 49 | 1  | 0 | 7.031185  | 1.230844  | 0.000000   |
| 50 | 6  | 0 | -0.031916 | -0.067467 | -3.676501  |
| 51 | 6  | 0 | -0.031916 | -0.067467 | 3.676501   |
| 52 | 6  | 0 | 0.432552  | -0.295583 | -5.026511  |
| 53 | 16 | 0 | 2.134196  | -0.170025 | -5.425317  |
| 54 | 6  | 0 | -0.283323 | -0.614557 | -6.151280  |
| 55 | 6  | 0 | 1.851948  | -0.571309 | -7.126033  |
| 56 | 6  | 0 | 0.479805  | -0.752543 | -7.358703  |
| 57 | 1  | 0 | -1.359921 | -0.746212 | -6.142447  |
| 58 | 6  | 0 | 3.015725  | -0.722284 | -7.986987  |
| 59 | 5  | 0 | -0.227587 | -0.983026 | -8.705472  |
| 60 | 6  | 0 | 3.016630  | -0.718066 | -9.417552  |
| 61 | 6  | 0 | 4.272481  | -0.875469 | -7.332471  |
| 62 | 6  | 0 | 0.481510  | -0.743888 | -10.049738 |
| 63 | 6  | 0 | -1.774675 | -1.345571 | -8.707649  |
| 64 | 6  | 0 | 1.854052  | -0.561579 | -10.279201 |
| 65 | 6  | 0 | 4.274220  | -0.867467 | -10.071310 |
| 66 | 6  | 0 | 5.478244  | -0.990914 | -7.990679  |
| 67 | 1  | 0 | 4.279767  | -0.937608 | -6.253072  |
| 68 | 6  | 0 | -0.279752 | -0.598611 | -11.257531 |
| 69 | 6  | 0 | -2.771787 | -0.344493 | -8.706535  |
| 70 | 6  | 0 | -2.179966 | -2.700950 | -8.707347  |
| 71 | 16 | 0 | 2.138848  | -0.149414 | -11.976803 |
| 72 | 6  | 0 | 5.479179  | -0.986743 | -9.412253  |
| 73 | 1  | 0 | 4.282913  | -0.923237 | -11.151040 |
| 74 | 8  | 0 | 6.688285  | -1.143459 | -7.399251  |
| 75 | 1  | 0 | -1.356177 | -0.731428 | -11.269114 |
| 76 | 6  | 0 | -4.125494 | -0.705552 | -8.706318  |
| 77 | 6  | 0 | -2.394887 | 1.123526  | -8.702395  |
| 78 | 6  | 0 | -3.539041 | -3.026538 | -8.706911  |
| 79 | 6  | 0 | -1.145895 | -3.807989 | -8.704571  |
| 80 | 8  | 0 | 6.689903  | -1.135736 | -10.002972 |
| 81 | 6  | 0 | 6.744080  | -1.160064 | -5.979445  |
| 82 | 6  | 0 | -4.531923 | -2.041336 | -8.708937  |
| 83 | 1  | 0 | -4.880397 | 0.079506  | -8.703221  |
| 84 | 1  | 0 | -1.796291 | 1.386002  | -7.821068  |
| 85 | 1  | 0 | -1.795212 | 1.390338  | -9.581680  |
| 86 | 1  | 0 | -3.284502 | 1.761936  | -8.701386  |
| 87 | 1  | 0 | -3.830486 | -4.075999 | -8.704026  |
| 88 | 1  | 0 | -0.492667 | -3.750847 | -9.584653  |
| 89 | 1  | 0 | -0.495758 | -3.749875 | -7.822282  |
| 90 | 1  | 0 | -1.618549 | -4.795560 | -8.704932  |



|     |    |   |           |           |            |
|-----|----|---|-----------|-----------|------------|
| 91  | 6  | 0 | 6.747673  | -1.143589 | -11.422894 |
| 92  | 1  | 0 | 7.799807  | -1.269753 | -5.726841  |
| 93  | 1  | 0 | 6.360319  | -0.224776 | -5.552230  |
| 94  | 1  | 0 | 6.180220  | -2.005981 | -5.565418  |
| 95  | 6  | 0 | -5.996064 | -2.416254 | -8.731035  |
| 96  | 1  | 0 | 6.364459  | -0.205705 | -11.844813 |
| 97  | 1  | 0 | 7.803751  | -1.251662 | -11.674669 |
| 98  | 1  | 0 | 6.184463  | -1.986991 | -11.842838 |
| 99  | 1  | 0 | -6.301266 | -2.785534 | -9.719369  |
| 100 | 1  | 0 | -6.218584 | -3.212426 | -8.010691  |
| 101 | 1  | 0 | -6.632730 | -1.558037 | -8.491177  |
| 102 | 6  | 0 | 0.432552  | -0.295583 | 5.026511   |
| 103 | 6  | 0 | -0.283323 | -0.614557 | 6.151280   |
| 104 | 16 | 0 | 2.134196  | -0.170025 | 5.425317   |
| 105 | 6  | 0 | 0.479805  | -0.752543 | 7.358703   |
| 106 | 1  | 0 | -1.359921 | -0.746212 | 6.142447   |
| 107 | 6  | 0 | 1.851948  | -0.571309 | 7.126033   |
| 108 | 5  | 0 | -0.227587 | -0.983026 | 8.705472   |
| 109 | 6  | 0 | 3.015725  | -0.722284 | 7.986987   |
| 110 | 6  | 0 | 0.481510  | -0.743888 | 10.049738  |
| 111 | 6  | 0 | -1.774675 | -1.345571 | 8.707649   |
| 112 | 6  | 0 | 3.016630  | -0.718066 | 9.417552   |
| 113 | 6  | 0 | 4.272481  | -0.875469 | 7.332471   |
| 114 | 6  | 0 | -0.279752 | -0.598611 | 11.257531  |
| 115 | 6  | 0 | 1.854052  | -0.561579 | 10.279201  |
| 116 | 6  | 0 | -2.771787 | -0.344493 | 8.706535   |
| 117 | 6  | 0 | -2.179966 | -2.700950 | 8.707347   |
| 118 | 6  | 0 | 4.274220  | -0.867467 | 10.071310  |
| 119 | 6  | 0 | 5.478244  | -0.990914 | 7.990679   |
| 120 | 1  | 0 | 4.279767  | -0.937608 | 6.253072   |
| 121 | 1  | 0 | -1.356177 | -0.731428 | 11.269114  |
| 122 | 16 | 0 | 2.138848  | -0.149414 | 11.976803  |
| 123 | 6  | 0 | -4.125494 | -0.705552 | 8.706318   |
| 124 | 6  | 0 | -2.394887 | 1.123526  | 8.702395   |
| 125 | 6  | 0 | -3.539041 | -3.026538 | 8.706911   |
| 126 | 6  | 0 | -1.145895 | -3.807989 | 8.704571   |
| 127 | 6  | 0 | 5.479179  | -0.986743 | 9.412253   |
| 128 | 1  | 0 | 4.282913  | -0.923237 | 11.151040  |
| 129 | 8  | 0 | 6.688285  | -1.143459 | 7.399251   |
| 130 | 6  | 0 | -4.531923 | -2.041336 | 8.708937   |
| 131 | 1  | 0 | -4.880397 | 0.079506  | 8.703221   |
| 132 | 1  | 0 | -1.795212 | 1.390338  | 9.581680   |
| 133 | 1  | 0 | -1.796291 | 1.386002  | 7.821068   |
| 134 | 1  | 0 | -3.284502 | 1.761936  | 8.701386   |
| 135 | 1  | 0 | -3.830486 | -4.075999 | 8.704026   |
| 136 | 1  | 0 | -0.495758 | -3.749875 | 7.822282   |
| 137 | 1  | 0 | -0.492667 | -3.750847 | 9.584653   |
| 138 | 1  | 0 | -1.618549 | -4.795560 | 8.704932   |
| 139 | 8  | 0 | 6.689903  | -1.135736 | 10.002972  |
| 140 | 6  | 0 | 6.744080  | -1.160064 | 5.979445   |
| 141 | 6  | 0 | -5.996064 | -2.416254 | 8.731035   |
| 142 | 6  | 0 | 6.747673  | -1.143589 | 11.422894  |
| 143 | 1  | 0 | 6.360319  | -0.224776 | 5.552230   |
| 144 | 1  | 0 | 7.799807  | -1.269753 | 5.726841   |
| 145 | 1  | 0 | 6.180220  | -2.005981 | 5.565418   |
| 146 | 1  | 0 | -6.218584 | -3.212426 | 8.010691   |
| 147 | 1  | 0 | -6.301266 | -2.785534 | 9.719369   |
| 148 | 1  | 0 | -6.632730 | -1.558037 | 8.491177   |
| 149 | 1  | 0 | 7.803751  | -1.251662 | 11.674669  |
| 150 | 1  | 0 | 6.364459  | -0.205705 | 11.844813  |
| 151 | 1  | 0 | 6.184463  | -1.986991 | 11.842838  |
| 152 | 6  | 0 | 0.437939  | -0.273094 | 12.379242  |

|     |    |   |           |           |            |
|-----|----|---|-----------|-----------|------------|
| 153 | 6  | 0 | 0.437939  | -0.273094 | -12.379242 |
| 154 | 6  | 0 | -0.023813 | -0.036943 | 13.728896  |
| 155 | 6  | 0 | 0.696101  | 0.273061  | 14.853729  |
| 156 | 16 | 0 | -1.727335 | -0.137014 | 14.127058  |
| 157 | 6  | 0 | -0.065712 | 0.422769  | 16.060553  |
| 158 | 1  | 0 | 1.774520  | 0.389173  | 14.845472  |
| 159 | 6  | 0 | -1.439557 | 0.261074  | 15.827101  |
| 160 | 5  | 0 | 0.643649  | 0.640311  | 17.409741  |
| 161 | 6  | 0 | -2.601811 | 0.433631  | 16.687534  |
| 162 | 6  | 0 | -0.068272 | 0.394271  | 18.750341  |
| 163 | 6  | 0 | 2.193149  | 0.991553  | 17.414638  |
| 164 | 6  | 0 | -2.603271 | 0.421521  | 18.116398  |
| 165 | 6  | 0 | -3.853591 | 0.621296  | 16.032413  |
| 166 | 6  | 0 | 0.694374  | 0.211842  | 19.962060  |
| 167 | 6  | 0 | -1.441708 | 0.228778  | 18.977352  |
| 168 | 6  | 0 | 3.184262  | -0.016005 | 17.413534  |
| 169 | 6  | 0 | 2.606983  | 2.343847  | 17.418151  |
| 170 | 6  | 0 | -3.854973 | 0.601471  | 18.771193  |
| 171 | 6  | 0 | -5.056107 | 0.764664  | 16.691273  |
| 172 | 1  | 0 | -3.858131 | 0.688886  | 14.953288  |
| 173 | 1  | 0 | 1.772399  | 0.323348  | 19.983846  |
| 174 | 16 | 0 | -1.729720 | -0.210309 | 20.667978  |
| 175 | 6  | 0 | 4.539870  | 0.336190  | 17.418846  |
| 176 | 6  | 0 | 2.798110  | -1.481633 | 17.402841  |
| 177 | 6  | 0 | 3.968474  | 2.660859  | 17.423127  |
| 178 | 6  | 0 | 1.580222  | 3.457774  | 17.412276  |
| 179 | 6  | 0 | -5.056812 | 0.755148  | 18.112255  |
| 180 | 1  | 0 | -3.860804 | 0.652267  | 19.851256  |
| 181 | 8  | 0 | -6.262252 | 0.950855  | 16.100370  |
| 182 | 6  | 0 | 4.954878  | 1.669725  | 17.427353  |
| 183 | 1  | 0 | 5.289783  | -0.453600 | 17.416366  |
| 184 | 1  | 0 | 2.195313  | -1.748192 | 18.280062  |
| 185 | 1  | 0 | 2.199161  | -1.736863 | 16.519593  |
| 186 | 1  | 0 | 3.683757  | -2.125478 | 17.400822  |
| 187 | 1  | 0 | 4.266712  | 3.708402  | 17.422683  |
| 188 | 1  | 0 | 0.938302  | 3.409465  | 16.523363  |
| 189 | 1  | 0 | 0.917720  | 3.399657  | 18.285374  |
| 190 | 1  | 0 | 2.059359  | 4.442204  | 17.423119  |
| 191 | 8  | 0 | -6.263575 | 0.934150  | 18.704128  |
| 192 | 6  | 0 | -6.316800 | 0.974881  | 14.680794  |
| 193 | 6  | 0 | 6.421533  | 2.033232  | 17.463687  |
| 194 | 6  | 0 | -6.320363 | 0.941994  | 20.123455  |
| 195 | 1  | 0 | -5.956689 | 0.031998  | 14.249591  |
| 196 | 1  | 0 | -7.369251 | 1.112459  | 14.428031  |
| 197 | 1  | 0 | -5.731396 | 1.807869  | 14.270375  |
| 198 | 1  | 0 | 6.635349  | 2.905826  | 16.835764  |
| 199 | 1  | 0 | 6.747624  | 2.283238  | 18.482463  |
| 200 | 1  | 0 | 7.048507  | 1.205125  | 17.116092  |
| 201 | 1  | 0 | -7.372901 | 1.078818  | 20.376294  |
| 202 | 1  | 0 | -5.963037 | -0.006687 | 20.544357  |
| 203 | 1  | 0 | -5.733810 | 1.768926  | 20.544442  |
| 204 | 6  | 0 | -0.023813 | -0.036943 | -13.728896 |
| 205 | 16 | 0 | -1.727335 | -0.137014 | -14.127058 |
| 206 | 6  | 0 | 0.696101  | 0.273061  | -14.853729 |
| 207 | 6  | 0 | -1.439557 | 0.261074  | -15.827101 |
| 208 | 6  | 0 | -0.065712 | 0.422769  | -16.060553 |
| 209 | 1  | 0 | 1.774520  | 0.389173  | -14.845472 |
| 210 | 6  | 0 | -2.601811 | 0.433631  | -16.687534 |
| 211 | 5  | 0 | 0.643649  | 0.640311  | -17.409741 |
| 212 | 6  | 0 | -2.603271 | 0.421521  | -18.116398 |
| 213 | 6  | 0 | -3.853591 | 0.621296  | -16.032413 |
| 214 | 6  | 0 | -0.068272 | 0.394271  | -18.750341 |

|     |    |   |           |           |            |
|-----|----|---|-----------|-----------|------------|
| 215 | 6  | 0 | 2.193149  | 0.991553  | -17.414638 |
| 216 | 6  | 0 | -1.441708 | 0.228778  | -18.977352 |
| 217 | 6  | 0 | -3.854973 | 0.601471  | -18.771193 |
| 218 | 6  | 0 | -5.056107 | 0.764664  | -16.691273 |
| 219 | 1  | 0 | -3.858131 | 0.688886  | -14.953288 |
| 220 | 6  | 0 | 0.694374  | 0.211842  | -19.962060 |
| 221 | 6  | 0 | 3.184262  | -0.016005 | -17.413534 |
| 222 | 6  | 0 | 2.606983  | 2.343847  | -17.418151 |
| 223 | 16 | 0 | -1.729720 | -0.210309 | -20.667978 |
| 224 | 6  | 0 | -5.056812 | 0.755148  | -18.112255 |
| 225 | 1  | 0 | -3.860804 | 0.652267  | -19.851256 |
| 226 | 8  | 0 | -6.262252 | 0.950855  | -16.100370 |
| 227 | 1  | 0 | 1.772399  | 0.323348  | -19.983846 |
| 228 | 6  | 0 | 4.539870  | 0.336190  | -17.418846 |
| 229 | 6  | 0 | 2.798110  | -1.481633 | -17.402841 |
| 230 | 6  | 0 | 3.968474  | 2.660859  | -17.423127 |
| 231 | 6  | 0 | 1.580222  | 3.457774  | -17.412276 |
| 232 | 8  | 0 | -6.263575 | 0.934150  | -18.704128 |
| 233 | 6  | 0 | -6.316800 | 0.974881  | -14.680794 |
| 234 | 6  | 0 | 4.954878  | 1.669725  | -17.427353 |
| 235 | 1  | 0 | 5.289783  | -0.453600 | -17.416366 |
| 236 | 1  | 0 | 2.199161  | -1.736863 | -16.519593 |
| 237 | 1  | 0 | 2.195313  | -1.748192 | -18.280062 |
| 238 | 1  | 0 | 3.683757  | -2.125478 | -17.400822 |
| 239 | 1  | 0 | 4.266712  | 3.708402  | -17.422683 |
| 240 | 1  | 0 | 0.917720  | 3.399657  | -18.285374 |
| 241 | 1  | 0 | 0.938302  | 3.409465  | -16.523363 |
| 242 | 1  | 0 | 2.059359  | 4.442204  | -17.423119 |
| 243 | 6  | 0 | -6.320363 | 0.941994  | -20.123455 |
| 244 | 1  | 0 | -7.369251 | 1.112459  | -14.428031 |
| 245 | 1  | 0 | -5.956689 | 0.031998  | -14.249591 |
| 246 | 1  | 0 | -5.731396 | 1.807869  | -14.270375 |
| 247 | 6  | 0 | 6.421533  | 2.033232  | -17.463687 |
| 248 | 1  | 0 | -5.963037 | -0.006687 | -20.544357 |
| 249 | 1  | 0 | -7.372901 | 1.078818  | -20.376294 |
| 250 | 1  | 0 | -5.733810 | 1.768926  | -20.544442 |
| 251 | 1  | 0 | 6.747624  | 2.283238  | -18.482463 |
| 252 | 1  | 0 | 6.635349  | 2.905826  | -16.835764 |
| 253 | 1  | 0 | 7.048507  | 1.205125  | -17.116092 |
| 254 | 6  | 0 | -0.043022 | -0.122940 | -21.052535 |
| 255 | 1  | 0 | 0.293608  | -0.330836 | -22.059835 |
| 256 | 6  | 0 | -0.043022 | -0.122940 | 21.052535  |
| 257 | 1  | 0 | 0.293608  | -0.330836 | 22.059835  |

**Table S4.** Coordinates for optimized structure of **O1'** in the ground state ( $S_0$ ).

Total Energy: -7582.38609200 Hartree

# opt b3lyp/6-31g(d) geom=connectivity

| Center<br>Number | Atomic<br>Number | Atomic<br>Type | Coordinates (Angstroms) |           |           |
|------------------|------------------|----------------|-------------------------|-----------|-----------|
|                  |                  |                | X                       | Y         | Z         |
| 1                | 6                | 0              | 1.268549                | -0.650932 | 0.010508  |
| 2                | 6                | 0              | 1.271211                | 0.741164  | 0.013063  |
| 3                | 6                | 0              | -0.000127               | 1.549421  | -0.000197 |
| 4                | 6                | 0              | -1.271435               | 0.741146  | -0.015454 |
| 5                | 6                | 0              | -1.268754               | -0.650962 | -0.016276 |
| 6                | 5                | 0              | -0.000075               | -1.516628 | -0.003946 |
| 7                | 6                | 0              | -2.570030               | 1.304158  | -0.028645 |

|    |    |   |            |           |           |
|----|----|---|------------|-----------|-----------|
| 8  | 6  | 0 | -3.582306  | 0.359187  | -0.039763 |
| 9  | 16 | 0 | -2.909599  | -1.256132 | -0.035633 |
| 10 | 16 | 0 | 2.909397   | -1.256147 | 0.028340  |
| 11 | 6  | 0 | 3.582095   | 0.359171  | 0.036522  |
| 12 | 6  | 0 | 2.569800   | 1.304148  | 0.027666  |
| 13 | 6  | 0 | 0.000451   | -3.092579 | -0.005871 |
| 14 | 6  | 0 | 0.010820   | -3.811201 | -1.223183 |
| 15 | 6  | 0 | 0.007640   | -5.209364 | -1.206384 |
| 16 | 6  | 0 | -0.002736  | -5.931087 | -0.009448 |
| 17 | 6  | 0 | -0.017118  | -5.212429 | 1.189047  |
| 18 | 6  | 0 | -0.014248  | -3.814113 | 1.209432  |
| 19 | 1  | 0 | 0.009588   | 2.222759  | -0.870900 |
| 20 | 1  | 0 | -0.009870  | 2.220608  | 0.872165  |
| 21 | 1  | 0 | -2.763841  | 2.372674  | -0.026512 |
| 22 | 1  | 0 | 2.763588   | 2.372671  | 0.028343  |
| 23 | 1  | 0 | 0.011965   | -5.748466 | -2.152485 |
| 24 | 1  | 0 | -0.032211  | -5.753899 | 2.133654  |
| 25 | 6  | 0 | -0.030960  | -3.085361 | 2.537532  |
| 26 | 1  | 0 | -0.043613  | -3.788552 | 3.376474  |
| 27 | 1  | 0 | 0.850656   | -2.442708 | 2.656413  |
| 28 | 1  | 0 | -0.912543  | -2.438789 | 2.632826  |
| 29 | 6  | 0 | 0.020951   | -3.078969 | -2.549428 |
| 30 | 1  | 0 | 0.029539   | -3.779948 | -3.390270 |
| 31 | 1  | 0 | -0.860753  | -2.435439 | -2.662605 |
| 32 | 1  | 0 | 0.902532   | -2.432701 | -2.646989 |
| 33 | 6  | 0 | 0.026803   | -7.442019 | -0.011485 |
| 34 | 1  | 0 | -0.478167  | -7.852270 | -0.892920 |
| 35 | 1  | 0 | 1.057717   | -7.821468 | -0.023383 |
| 36 | 1  | 0 | -0.459071  | -7.854113 | 0.879617  |
| 37 | 6  | 0 | -5.011144  | 0.582864  | -0.053496 |
| 38 | 6  | 0 | -6.023755  | -0.360747 | -0.009917 |
| 39 | 16 | 0 | -5.683384  | 2.196449  | -0.133217 |
| 40 | 6  | 0 | -7.322287  | 0.201956  | -0.038605 |
| 41 | 1  | 0 | -5.830362  | -1.427947 | 0.044734  |
| 42 | 6  | 0 | -7.324506  | 1.592425  | -0.104951 |
| 43 | 6  | 0 | -8.593997  | -0.604911 | -0.000509 |
| 44 | 5  | 0 | -8.593234  | 2.457337  | -0.148762 |
| 45 | 6  | 0 | -9.865105  | 0.202775  | -0.041135 |
| 46 | 1  | 0 | -8.593355  | -1.318891 | -0.838257 |
| 47 | 1  | 0 | -8.595140  | -1.233903 | 0.902813  |
| 48 | 6  | 0 | -9.861968  | 1.593213  | -0.108751 |
| 49 | 6  | 0 | -8.592728  | 4.031498  | -0.225774 |
| 50 | 6  | 0 | -11.163951 | -0.359417 | -0.016047 |
| 51 | 16 | 0 | -11.503082 | 2.197788  | -0.139850 |
| 52 | 6  | 0 | -8.586911  | 4.691175  | -1.476048 |
| 53 | 6  | 0 | -8.593082  | 4.810280  | 0.953732  |
| 54 | 6  | 0 | -12.176085 | 0.584402  | -0.063626 |
| 55 | 1  | 0 | -11.357942 | -1.426742 | 0.033515  |
| 56 | 6  | 0 | -8.582778  | 6.088539  | -1.526020 |
| 57 | 6  | 0 | -8.580866  | 3.896458  | -2.765840 |
| 58 | 6  | 0 | -8.588903  | 6.206054  | 0.866645  |
| 59 | 6  | 0 | -8.593623  | 4.145755  | 2.315209  |
| 60 | 6  | 0 | -8.587222  | 6.866626  | -0.364886 |
| 61 | 1  | 0 | -8.574438  | 6.581820  | -2.496787 |
| 62 | 1  | 0 | -8.578051  | 4.556486  | -3.639243 |
| 63 | 1  | 0 | -7.698460  | 3.247910  | -2.836895 |
| 64 | 1  | 0 | -9.461733  | 3.246570  | -2.843603 |
| 65 | 1  | 0 | -8.585516  | 6.792020  | 1.784442  |
| 66 | 1  | 0 | -8.593005  | 4.888181  | 3.119748  |
| 67 | 1  | 0 | -9.476045  | 3.507960  | 2.452687  |
| 68 | 1  | 0 | -7.712705  | 3.505962  | 2.453065  |
| 69 | 6  | 0 | -8.615414  | 8.375749  | -0.439584 |

|     |    |   |            |           |           |
|-----|----|---|------------|-----------|-----------|
| 70  | 1  | 0 | -8.096400  | 8.743335  | -1.331639 |
| 71  | 1  | 0 | -9.645663  | 8.754417  | -0.485743 |
| 72  | 1  | 0 | -8.143081  | 8.829901  | 0.438258  |
| 73  | 6  | 0 | 5.010918   | 0.582886  | 0.050922  |
| 74  | 6  | 0 | 6.023600   | -0.360678 | 0.007909  |
| 75  | 16 | 0 | 5.683065   | 2.196504  | 0.130823  |
| 76  | 6  | 0 | 7.322096   | 0.202073  | 0.037252  |
| 77  | 1  | 0 | 5.830284   | -1.427899 | -0.046598 |
| 78  | 6  | 0 | 7.324224   | 1.592542  | 0.103552  |
| 79  | 6  | 0 | 8.593862   | -0.604744 | -0.000083 |
| 80  | 5  | 0 | 8.592890   | 2.457513  | 0.148024  |
| 81  | 6  | 0 | 9.864917   | 0.202996  | 0.041233  |
| 82  | 1  | 0 | 8.592779   | -1.318689 | 0.837694  |
| 83  | 1  | 0 | 8.595548   | -1.233765 | -0.903385 |
| 84  | 6  | 0 | 9.861682   | 1.593436  | 0.108768  |
| 85  | 6  | 0 | 8.592277   | 4.031675  | 0.224953  |
| 86  | 6  | 0 | 11.163800  | -0.359141 | 0.016910  |
| 87  | 16 | 0 | 11.502750  | 2.198081  | 0.140793  |
| 88  | 6  | 0 | 8.585729   | 4.691420  | 1.475188  |
| 89  | 6  | 0 | 8.593266   | 4.810393  | -0.954596 |
| 90  | 6  | 0 | 12.175868  | 0.584723  | 0.065012  |
| 91  | 1  | 0 | 11.357867  | -1.426459 | -0.032534 |
| 92  | 6  | 0 | 8.581511   | 6.088787  | 1.525082  |
| 93  | 6  | 0 | 8.579002   | 3.896774  | 2.765020  |
| 94  | 6  | 0 | 8.588984   | 6.206171  | -0.867586 |
| 95  | 6  | 0 | 8.594585   | 4.145795  | -2.316037 |
| 96  | 6  | 0 | 8.586581   | 6.866811  | 0.363907  |
| 97  | 1  | 0 | 8.572604   | 6.582121  | 2.495817  |
| 98  | 1  | 0 | 8.575600   | 4.556849  | 3.638385  |
| 99  | 1  | 0 | 7.696625   | 3.248133  | 2.835588  |
| 100 | 1  | 0 | 9.459895   | 3.246986  | 2.843341  |
| 101 | 1  | 0 | 8.586091   | 6.792088  | -1.785416 |
| 102 | 1  | 0 | 8.594483   | 4.888179  | -3.120615 |
| 103 | 1  | 0 | 9.477055   | 3.507948  | -2.452957 |
| 104 | 1  | 0 | 7.713714   | 3.506043  | -2.454385 |
| 105 | 6  | 0 | 8.614668   | 8.375939  | 0.438539  |
| 106 | 1  | 0 | 8.095111   | 8.743554  | 1.330266  |
| 107 | 1  | 0 | 9.644875   | 8.754649  | 0.485288  |
| 108 | 1  | 0 | 8.142838   | 8.830023  | -0.439608 |
| 109 | 6  | 0 | -13.605345 | 0.361074  | -0.055739 |
| 110 | 6  | 0 | -14.617087 | 1.303008  | -0.132478 |
| 111 | 16 | 0 | -14.278518 | -1.249807 | 0.060711  |
| 112 | 6  | 0 | -15.916447 | 0.741051  | -0.099066 |
| 113 | 1  | 0 | -14.423095 | 2.368535  | -0.212493 |
| 114 | 6  | 0 | -15.919156 | -0.646510 | 0.004165  |
| 115 | 6  | 0 | -17.188020 | 1.545993  | -0.168010 |
| 116 | 5  | 0 | -17.190344 | -1.509164 | 0.060303  |
| 117 | 6  | 0 | -18.459577 | 0.740358  | -0.115463 |
| 118 | 1  | 0 | -17.192497 | 2.282519  | 0.650306  |
| 119 | 1  | 0 | -17.181281 | 2.151279  | -1.087662 |
| 120 | 6  | 0 | -18.459273 | -0.646280 | -0.011896 |
| 121 | 6  | 0 | -17.188053 | -3.080778 | 0.177447  |
| 122 | 6  | 0 | -19.766538 | 1.303843  | -0.165429 |
| 123 | 16 | 0 | -20.105075 | -1.245023 | 0.022778  |
| 124 | 6  | 0 | -17.192540 | -3.708481 | 1.443969  |
| 125 | 6  | 0 | -17.176179 | -3.889130 | -0.981822 |
| 126 | 6  | 0 | -20.751770 | 0.351871  | -0.100269 |
| 127 | 1  | 0 | -19.967878 | 2.367680  | -0.246061 |
| 128 | 6  | 0 | -17.186386 | -5.104103 | 1.529428  |
| 129 | 6  | 0 | -17.200518 | -2.881155 | 2.713079  |
| 130 | 6  | 0 | -17.170338 | -5.282212 | -0.859383 |
| 131 | 6  | 0 | -17.166309 | -3.259166 | -2.359593 |

|     |    |   |            |           |           |
|-----|----|---|------------|-----------|-----------|
| 132 | 1  | 0 | -21.822369 | 0.511141  | -0.118586 |
| 133 | 6  | 0 | -17.178909 | -5.911383 | 0.388438  |
| 134 | 1  | 0 | -17.186513 | -5.572585 | 2.512442  |
| 135 | 1  | 0 | -17.203778 | -3.518704 | 3.603032  |
| 136 | 1  | 0 | -16.320700 | -2.228141 | 2.775588  |
| 137 | 1  | 0 | -18.084030 | -2.232412 | 2.765908  |
| 138 | 1  | 0 | -17.157902 | -5.891216 | -1.761985 |
| 139 | 1  | 0 | -17.157272 | -4.021637 | -3.145121 |
| 140 | 1  | 0 | -18.048922 | -2.627137 | -2.520261 |
| 141 | 1  | 0 | -16.285574 | -2.620971 | -2.506079 |
| 142 | 6  | 0 | -17.205904 | -7.418159 | 0.501100  |
| 143 | 1  | 0 | -16.694941 | -7.762275 | 1.407077  |
| 144 | 1  | 0 | -18.236103 | -7.796929 | 0.547080  |
| 145 | 1  | 0 | -16.724711 | -7.893737 | -0.360453 |
| 146 | 6  | 0 | 13.605141  | 0.361453  | 0.057937  |
| 147 | 6  | 0 | 14.616807  | 1.303478  | 0.134571  |
| 148 | 16 | 0 | 14.278440  | -1.249472 | -0.057194 |
| 149 | 6  | 0 | 15.916207  | 0.741558  | 0.102108  |
| 150 | 1  | 0 | 14.422733  | 2.369050  | 0.213794  |
| 151 | 6  | 0 | 15.919025  | -0.646065 | -0.000278 |
| 152 | 6  | 0 | 17.187713  | 1.546597  | 0.171138  |
| 153 | 5  | 0 | 17.190277  | -1.508699 | -0.055310 |
| 154 | 6  | 0 | 18.459329  | 0.740983  | 0.119683  |
| 155 | 1  | 0 | 17.192539  | 2.282611  | -0.647636 |
| 156 | 1  | 0 | 17.180522  | 2.152458  | 1.090407  |
| 157 | 6  | 0 | 18.459133  | -0.645719 | 0.016963  |
| 158 | 6  | 0 | 17.188103  | -3.080381 | -0.171536 |
| 159 | 6  | 0 | 19.766242  | 1.304555  | 0.169915  |
| 160 | 16 | 0 | 20.104977  | -1.244411 | -0.016576 |
| 161 | 6  | 0 | 17.193194  | -3.708815 | -1.437693 |
| 162 | 6  | 0 | 17.175735  | -3.888063 | 0.988194  |
| 163 | 6  | 0 | 20.751545  | 0.352586  | 0.105798  |
| 164 | 1  | 0 | 19.967498  | 2.368450  | 0.249992  |
| 165 | 6  | 0 | 17.187142  | -5.104487 | -1.522348 |
| 166 | 6  | 0 | 17.201712  | -2.882222 | -2.707278 |
| 167 | 6  | 0 | 17.170013  | -5.281216 | 0.866558  |
| 168 | 6  | 0 | 17.165214  | -3.257301 | 2.365596  |
| 169 | 1  | 0 | 21.822128  | 0.511913  | 0.124520  |
| 170 | 6  | 0 | 17.179183  | -5.911107 | -0.380896 |
| 171 | 1  | 0 | 17.187744  | -5.573538 | -2.505091 |
| 172 | 1  | 0 | 17.205420  | -3.520284 | -3.596861 |
| 173 | 1  | 0 | 16.321887  | -2.229293 | -2.770569 |
| 174 | 1  | 0 | 18.085212  | -2.233460 | -2.760072 |
| 175 | 1  | 0 | 17.157198  | -5.889699 | 1.769506  |
| 176 | 1  | 0 | 17.155842  | -4.019317 | 3.151562  |
| 177 | 1  | 0 | 18.047733  | -2.625151 | 2.526301  |
| 178 | 1  | 0 | 16.284392  | -2.619048 | 2.511307  |
| 179 | 6  | 0 | 17.206311  | -7.417947 | -0.492673 |
| 180 | 1  | 0 | 16.695863  | -7.762611 | -1.398733 |
| 181 | 1  | 0 | 18.236553  | -7.796694 | -0.537866 |
| 182 | 1  | 0 | 16.724668  | -7.893052 | 0.368890  |

**Table S5.** Coordinates for optimized structure of **O2'** in the ground state ( $S_0$ ).

Total Energy: -7582.32466967 Hartree

# opt b3lyp/6-31g(d) geom=connectivity

| Center<br>Number | Atomic<br>Number | Atomic<br>Type | Coordinates (Angstroms) |   |   |
|------------------|------------------|----------------|-------------------------|---|---|
|                  |                  |                | X                       | Y | Z |

|    |    |   |           |           |           |
|----|----|---|-----------|-----------|-----------|
| 1  | 6  | 0 | -0.000186 | -1.997459 | -0.004765 |
| 2  | 5  | 0 | 0.000115  | 1.055312  | 0.004014  |
| 3  | 6  | 0 | 0.000004  | 2.631685  | 0.009287  |
| 4  | 6  | 0 | -0.029285 | 3.356111  | -1.203349 |
| 5  | 6  | 0 | -0.024830 | 4.754560  | -1.180853 |
| 6  | 6  | 0 | 0.004589  | 5.471124  | 0.018853  |
| 7  | 6  | 0 | 0.037302  | 4.746358  | 1.213635  |
| 8  | 6  | 0 | 0.034376  | 3.347873  | 1.226770  |
| 9  | 1  | 0 | -0.005502 | -2.664025 | -0.880256 |
| 10 | 1  | 0 | 0.004996  | -2.668535 | 0.867280  |
| 11 | 1  | 0 | -0.043325 | 5.297695  | -2.124561 |
| 12 | 1  | 0 | 0.067117  | 5.283030  | 2.160759  |
| 13 | 6  | 0 | 0.070503  | 2.609555  | 2.549283  |
| 14 | 1  | 0 | 0.098254  | 3.305220  | 3.394160  |
| 15 | 1  | 0 | -0.810635 | 1.967484  | 2.677205  |
| 16 | 1  | 0 | 0.951527  | 1.959296  | 2.625338  |
| 17 | 6  | 0 | -0.058938 | 2.626871  | -2.531055 |
| 18 | 1  | 0 | -0.083123 | 3.328305  | -3.371259 |
| 19 | 1  | 0 | 0.822604  | 1.985495  | -2.659621 |
| 20 | 1  | 0 | -0.939768 | 1.977346  | -2.615324 |
| 21 | 6  | 0 | -0.024181 | 6.982175  | 0.024975  |
| 22 | 1  | 0 | 0.440657  | 7.396135  | -0.876503 |
| 23 | 1  | 0 | -1.054120 | 7.362701  | 0.062160  |
| 24 | 1  | 0 | 0.502068  | 7.390177  | 0.894921  |
| 25 | 6  | 0 | -1.306140 | 0.222598  | 0.010064  |
| 26 | 6  | 0 | -1.247963 | -1.160361 | 0.005710  |
| 27 | 6  | 0 | -2.664226 | 0.688837  | 0.028445  |
| 28 | 16 | 0 | -2.828519 | -1.886593 | 0.013215  |
| 29 | 6  | 0 | -3.611523 | -0.303502 | 0.036666  |
| 30 | 1  | 0 | -2.917010 | 1.744328  | 0.048269  |
| 31 | 6  | 0 | 1.306198  | 0.222386  | -0.007303 |
| 32 | 6  | 0 | 1.247742  | -1.160548 | -0.010862 |
| 33 | 6  | 0 | 2.664384  | 0.688446  | -0.023191 |
| 34 | 16 | 0 | 2.828148  | -1.887069 | -0.022900 |
| 35 | 6  | 0 | 3.611498  | -0.304020 | -0.037231 |
| 36 | 1  | 0 | 2.917344  | 1.744002  | -0.036736 |
| 37 | 6  | 0 | 5.057761  | -0.203636 | -0.057163 |
| 38 | 6  | 0 | 6.000236  | -1.170187 | -0.301629 |
| 39 | 16 | 0 | 5.847954  | 1.341433  | 0.271665  |
| 40 | 6  | 0 | 7.359928  | -0.712142 | -0.241449 |
| 41 | 1  | 0 | 5.742273  | -2.198337 | -0.535593 |
| 42 | 6  | 0 | 7.424190  | 0.638030  | 0.056615  |
| 43 | 5  | 0 | 8.661900  | -1.520717 | -0.467656 |
| 44 | 6  | 0 | 8.674816  | 1.459459  | 0.193746  |
| 45 | 6  | 0 | 8.655272  | -3.059908 | -0.808308 |
| 46 | 6  | 0 | 9.970821  | -0.703270 | -0.333347 |
| 47 | 1  | 0 | 8.646243  | 2.301642  | -0.513896 |
| 48 | 1  | 0 | 8.709018  | 1.923178  | 1.191053  |
| 49 | 6  | 0 | 9.918278  | 0.646678  | -0.031735 |
| 50 | 6  | 0 | 8.605168  | -3.500701 | -2.149738 |
| 51 | 6  | 0 | 8.694361  | -4.025733 | 0.222138  |
| 52 | 6  | 0 | 11.326618 | -1.155081 | -0.474850 |
| 53 | 16 | 0 | 11.500690 | 1.361729  | 0.068548  |
| 54 | 6  | 0 | 8.596330  | -4.869998 | -2.434268 |
| 55 | 6  | 0 | 8.556390  | -2.497880 | -3.284385 |
| 56 | 6  | 0 | 8.684226  | -5.387376 | -0.097165 |
| 57 | 6  | 0 | 8.743080  | -3.595450 | 1.674012  |
| 58 | 6  | 0 | 12.277553 | -0.183887 | -0.288615 |
| 59 | 1  | 0 | 11.575825 | -2.187743 | -0.698096 |
| 60 | 6  | 0 | 8.638957  | -5.832337 | -1.421413 |
| 61 | 1  | 0 | 8.553812  | -5.192884 | -3.473446 |

|     |    |   |            |           |           |
|-----|----|---|------------|-----------|-----------|
| 62  | 1  | 0 | 8.524104   | -2.997786 | -4.257832 |
| 63  | 1  | 0 | 7.672570   | -1.850682 | -3.214128 |
| 64  | 1  | 0 | 9.434288   | -1.838955 | -3.278609 |
| 65  | 1  | 0 | 8.711085   | -6.118814 | 0.709197  |
| 66  | 1  | 0 | 8.767836   | -4.459497 | 2.345840  |
| 67  | 1  | 0 | 9.631248   | -2.985758 | 1.884642  |
| 68  | 1  | 0 | 7.869383   | -2.988859 | 1.945333  |
| 69  | 6  | 0 | 8.661634   | -7.307580 | -1.748938 |
| 70  | 1  | 0 | 8.128089   | -7.519904 | -2.681911 |
| 71  | 1  | 0 | 9.689789   | -7.674107 | -1.873508 |
| 72  | 1  | 0 | 8.201040   | -7.902632 | -0.952761 |
| 73  | 6  | 0 | -5.057791  | -0.202958 | 0.056881  |
| 74  | 6  | 0 | -6.000311  | -1.169220 | 0.302245  |
| 75  | 16 | 0 | -5.847864  | 1.341912  | -0.273126 |
| 76  | 6  | 0 | -7.359968  | -0.711059 | 0.241944  |
| 77  | 1  | 0 | -5.742348  | -2.197147 | 0.537180  |
| 78  | 6  | 0 | -7.424151  | 0.638887  | -0.057163 |
| 79  | 5  | 0 | -8.661985  | -1.519305 | 0.469138  |
| 80  | 6  | 0 | -8.674723  | 1.460356  | -0.194593 |
| 81  | 6  | 0 | -8.655452  | -3.058161 | 0.811281  |
| 82  | 6  | 0 | -9.970860  | -0.701889 | 0.334166  |
| 83  | 1  | 0 | -8.646056  | 2.302777  | 0.512771  |
| 84  | 1  | 0 | -8.708935  | 1.923730  | -1.192054 |
| 85  | 6  | 0 | -9.918243  | 0.647777  | 0.031306  |
| 86  | 6  | 0 | -8.605288  | -3.497641 | 2.153140  |
| 87  | 6  | 0 | -8.694710  | -4.024990 | -0.218215 |
| 88  | 6  | 0 | -11.326690 | -1.153552 | 0.475854  |
| 89  | 16 | 0 | -11.500626 | 1.362756  | -0.069934 |
| 90  | 6  | 0 | -8.596558  | -4.866655 | 2.439015  |
| 91  | 6  | 0 | -8.556318  | -2.493707 | 3.286795  |
| 92  | 6  | 0 | -8.684677  | -5.386322 | 0.102427  |
| 93  | 6  | 0 | -8.743531  | -3.596133 | -1.670507 |
| 94  | 6  | 0 | -12.277572 | -0.182524 | 0.288524  |
| 95  | 1  | 0 | -11.575968 | -2.186018 | 0.699922  |
| 96  | 6  | 0 | -8.639352  | -5.829986 | 1.427107  |
| 97  | 1  | 0 | -8.553986  | -5.188523 | 3.478507  |
| 98  | 1  | 0 | -8.524050  | -2.992655 | 4.260733  |
| 99  | 1  | 0 | -7.672410  | -1.846702 | 3.215856  |
| 100 | 1  | 0 | -9.434126  | -1.834667 | 3.280412  |
| 101 | 1  | 0 | -8.711664  | -6.118549 | -0.703213 |
| 102 | 1  | 0 | -8.768239  | -4.460839 | -2.341488 |
| 103 | 1  | 0 | -9.631767  | -2.986732 | -1.881694 |
| 104 | 1  | 0 | -7.869903  | -2.989727 | -1.942465 |
| 105 | 6  | 0 | -8.662139  | -7.304901 | 1.756094  |
| 106 | 1  | 0 | -8.128176  | -7.516407 | 2.689014  |
| 107 | 1  | 0 | -9.690301  | -7.671111 | 1.881536  |
| 108 | 1  | 0 | -8.202046  | -7.900818 | 0.960277  |
| 109 | 6  | 0 | 13.723019  | -0.278427 | -0.351197 |
| 110 | 6  | 0 | 14.678238  | 0.615529  | 0.061927  |
| 111 | 16 | 0 | 14.493518  | -1.707981 | -1.045703 |
| 112 | 6  | 0 | 16.032614  | 0.189899  | -0.153705 |
| 113 | 1  | 0 | 14.433675  | 1.564968  | 0.527959  |
| 114 | 6  | 0 | 16.080138  | -1.060487 | -0.745130 |
| 115 | 5  | 0 | 17.346446  | 0.935431  | 0.192269  |
| 116 | 6  | 0 | 17.321307  | -1.824319 | -1.110823 |
| 117 | 6  | 0 | 17.357004  | 2.360073  | 0.867967  |
| 118 | 6  | 0 | 18.645381  | 0.177589  | -0.174676 |
| 119 | 1  | 0 | 17.319537  | -2.800311 | -0.602925 |
| 120 | 1  | 0 | 17.310925  | -2.058965 | -2.185712 |
| 121 | 6  | 0 | 18.576766  | -1.072911 | -0.765311 |
| 122 | 6  | 0 | 17.360457  | 2.489869  | 2.274887  |
| 123 | 6  | 0 | 17.357836  | 3.532029  | 0.079002  |



|     |    |   |            |           |           |
|-----|----|---|------------|-----------|-----------|
| 124 | 6  | 0 | 20.013010  | 0.593655  | 0.012720  |
| 125 | 16 | 0 | 20.154847  | -1.731572 | -1.087736 |
| 126 | 6  | 0 | 17.366327  | 3.760847  | 2.858503  |
| 127 | 6  | 0 | 17.353284  | 1.258680  | 3.157855  |
| 128 | 6  | 0 | 17.363687  | 4.787903  | 0.694669  |
| 129 | 6  | 0 | 17.347101  | 3.437614  | -1.433112 |
| 130 | 1  | 0 | 20.282507  | 1.544395  | 0.460618  |
| 131 | 6  | 0 | 17.371575  | 4.925499  | 2.085568  |
| 132 | 1  | 0 | 17.365348  | 3.843073  | 3.944432  |
| 133 | 1  | 0 | 17.362277  | 1.528344  | 4.218894  |
| 134 | 1  | 0 | 16.464671  | 0.639182  | 2.980317  |
| 135 | 1  | 0 | 18.227252  | 0.621821  | 2.969484  |
| 136 | 1  | 0 | 17.360510  | 5.681195  | 0.071772  |
| 137 | 1  | 0 | 17.353544  | 4.430137  | -1.895145 |
| 138 | 1  | 0 | 18.220829  | 2.890149  | -1.809594 |
| 139 | 1  | 0 | 16.458258  | 2.907151  | -1.798536 |
| 140 | 6  | 0 | 17.410585  | 6.290317  | 2.733608  |
| 141 | 1  | 0 | 16.908858  | 6.286736  | 3.707518  |
| 142 | 1  | 0 | 18.443588  | 6.623707  | 2.903151  |
| 143 | 1  | 0 | 16.926127  | 7.046512  | 2.106244  |
| 144 | 6  | 0 | -13.723060 | -0.276995 | 0.350803  |
| 145 | 6  | 0 | -14.678176 | 0.615653  | -0.065365 |
| 146 | 16 | 0 | -14.493716 | -1.704587 | 1.049156  |
| 147 | 6  | 0 | -16.032606 | 0.190510  | 0.150898  |
| 148 | 1  | 0 | -14.433487 | 1.563711  | -0.534135 |
| 149 | 6  | 0 | -16.080266 | -1.058156 | 0.745941  |
| 150 | 5  | 0 | -17.346363 | 0.934803  | -0.198026 |
| 151 | 6  | 0 | -17.321521 | -1.821046 | 1.113307  |
| 152 | 6  | 0 | -17.356751 | 2.357268  | -0.878294 |
| 153 | 6  | 0 | -18.645383 | 0.177892  | 0.170530  |
| 154 | 1  | 0 | -17.319365 | -2.798587 | 0.608406  |
| 155 | 1  | 0 | -17.311654 | -2.052391 | 2.188917  |
| 156 | 6  | 0 | -18.576904 | -1.070855 | 0.764881  |
| 157 | 6  | 0 | -17.358639 | 2.482518  | -2.285631 |
| 158 | 6  | 0 | -17.359013 | 3.531765  | -0.093122 |
| 159 | 6  | 0 | -20.012973 | 0.593168  | -0.018896 |
| 160 | 16 | 0 | -20.155059 | -1.728814 | 1.088359  |
| 161 | 6  | 0 | -17.364404 | 3.751601  | -2.873359 |
| 162 | 6  | 0 | -17.350052 | 1.248489  | -3.164614 |
| 163 | 6  | 0 | -17.364699 | 4.785640  | -0.712853 |
| 164 | 6  | 0 | -17.349856 | 3.442249  | 1.419303  |
| 165 | 1  | 0 | -20.282373 | 1.542523  | -0.469779 |
| 166 | 6  | 0 | -17.371047 | 4.918739  | -2.104197 |
| 167 | 1  | 0 | -17.362238 | 3.830318  | -3.959546 |
| 168 | 1  | 0 | -17.357637 | 1.514727  | -4.226528 |
| 169 | 1  | 0 | -16.461593 | 0.629705  | -2.983856 |
| 170 | 1  | 0 | -18.224186 | 0.612107  | -2.975391 |
| 171 | 1  | 0 | -17.362637 | 5.680943  | -0.092845 |
| 172 | 1  | 0 | -17.357948 | 4.436254  | 1.878115  |
| 173 | 1  | 0 | -18.223354 | 2.894985  | 1.796598  |
| 174 | 1  | 0 | -16.460794 | 2.914013  | 1.787423  |
| 175 | 6  | 0 | -17.409919 | 6.281436  | -2.756696 |
| 176 | 1  | 0 | -16.906896 | 6.274975  | -3.729923 |
| 177 | 1  | 0 | -18.442873 | 6.613719  | -2.928694 |
| 178 | 1  | 0 | -16.926699 | 7.039916  | -2.131138 |
| 179 | 6  | 0 | -20.928178 | -0.313909 | 0.419149  |
| 180 | 1  | 0 | -22.008267 | -0.254127 | 0.397449  |
| 181 | 6  | 0 | 20.928116  | -0.314586 | -0.423117 |
| 182 | 1  | 0 | 22.008207  | -0.254572 | -0.402191 |
